# Supplementary material for: Burden of Asthma in Europe from 1990 to 2021: A Sub-analysis of the Global Burden of Disease Study
Source: Research Square preprint supplement (doi:10.21203/rs.3.rs-6691765/v1), 2025-06-26
Supplement: Supplementary file 1 [file cb40357dcb9c0f9ffc1a4888.docx]

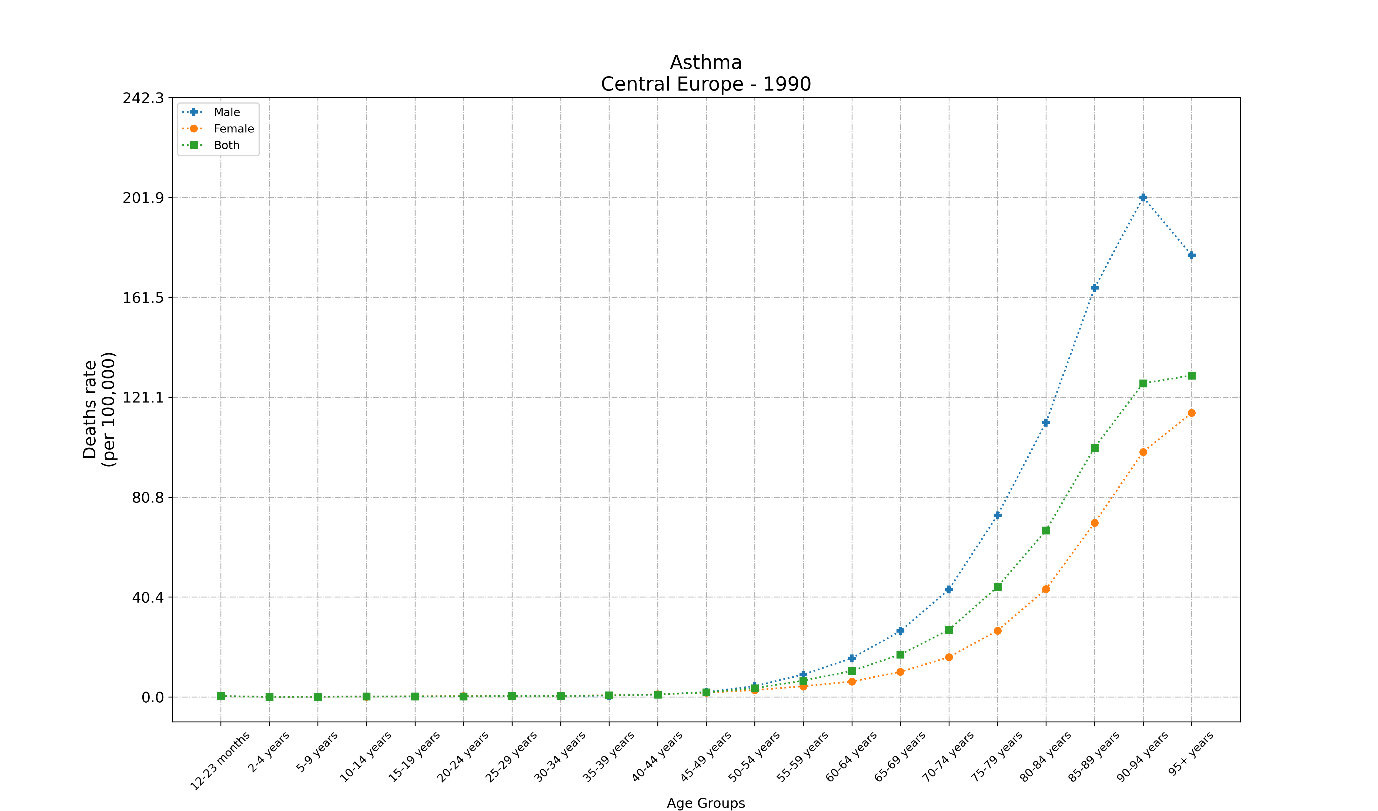

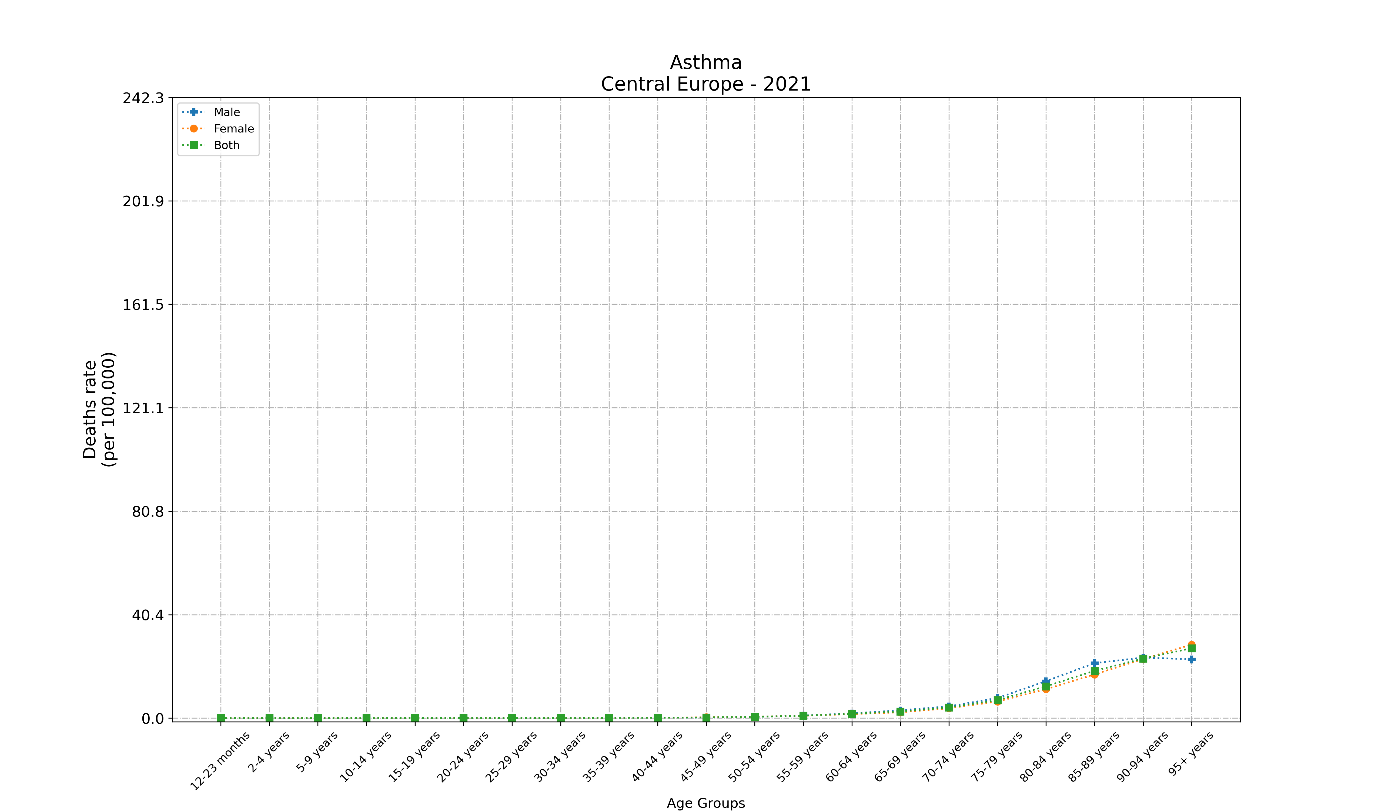

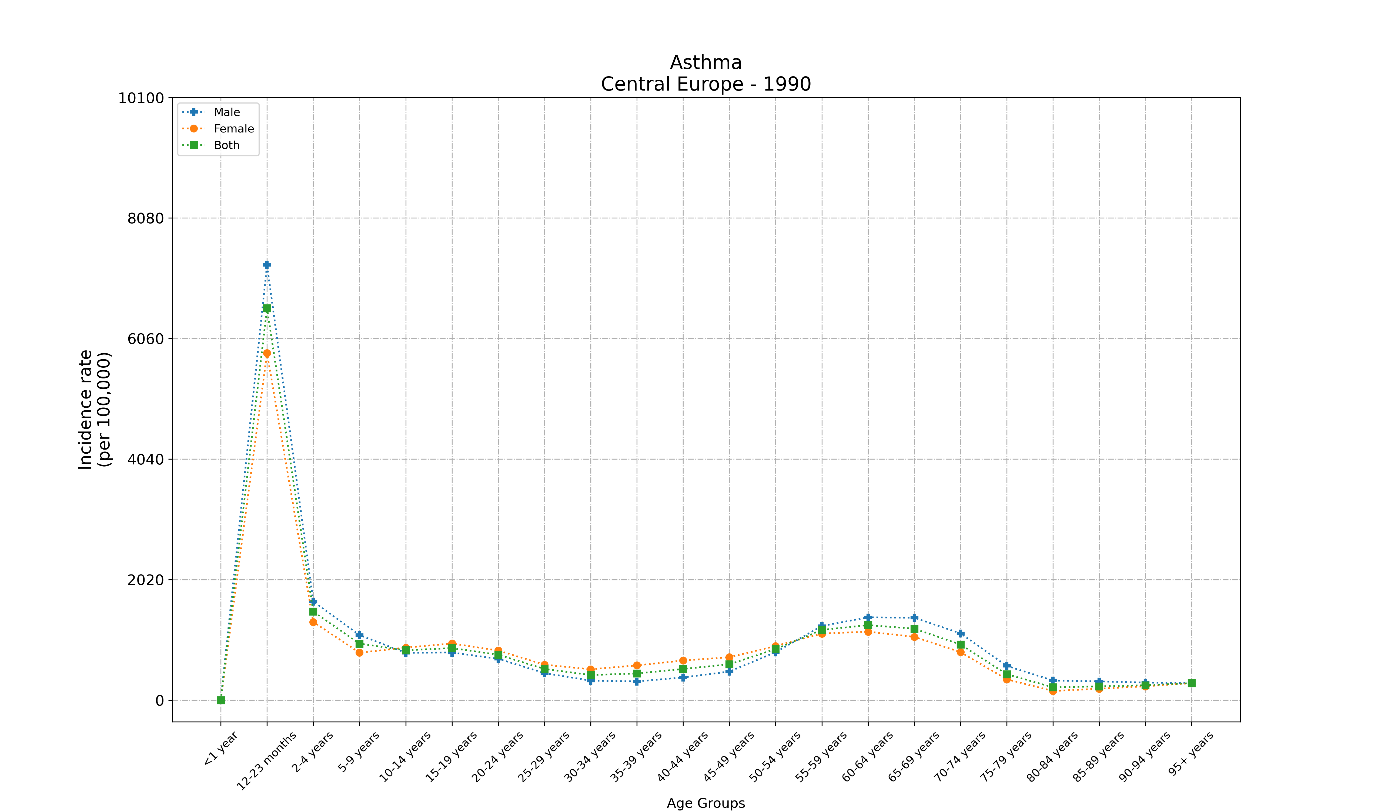

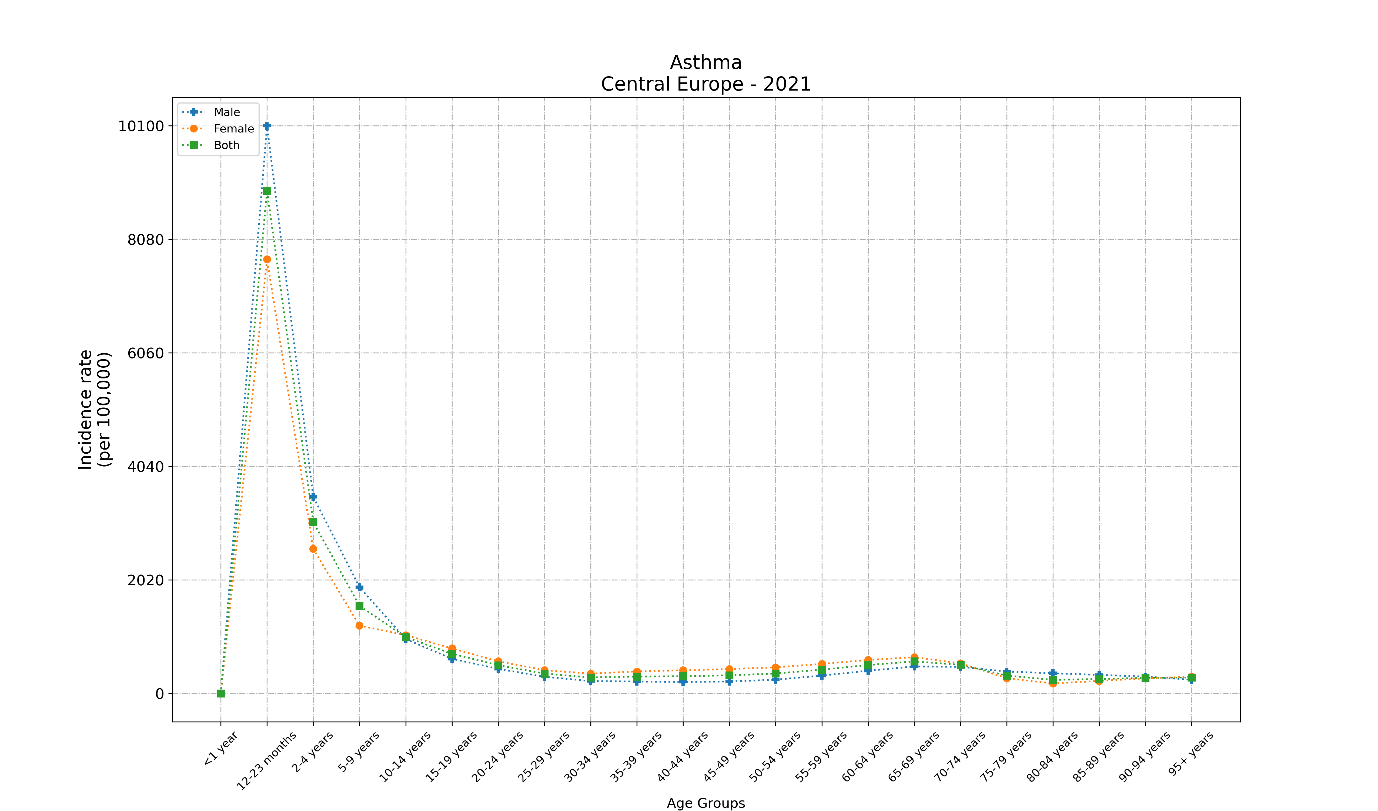

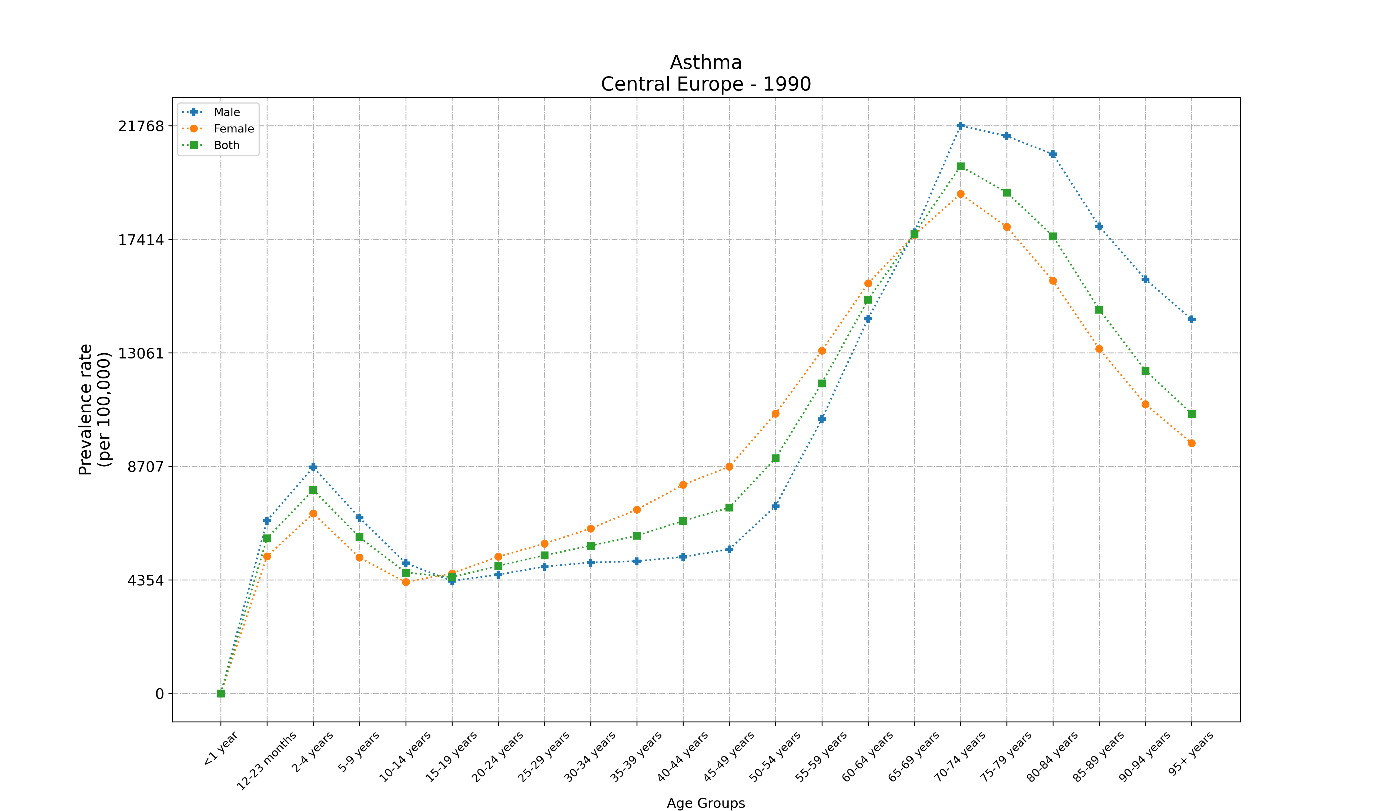

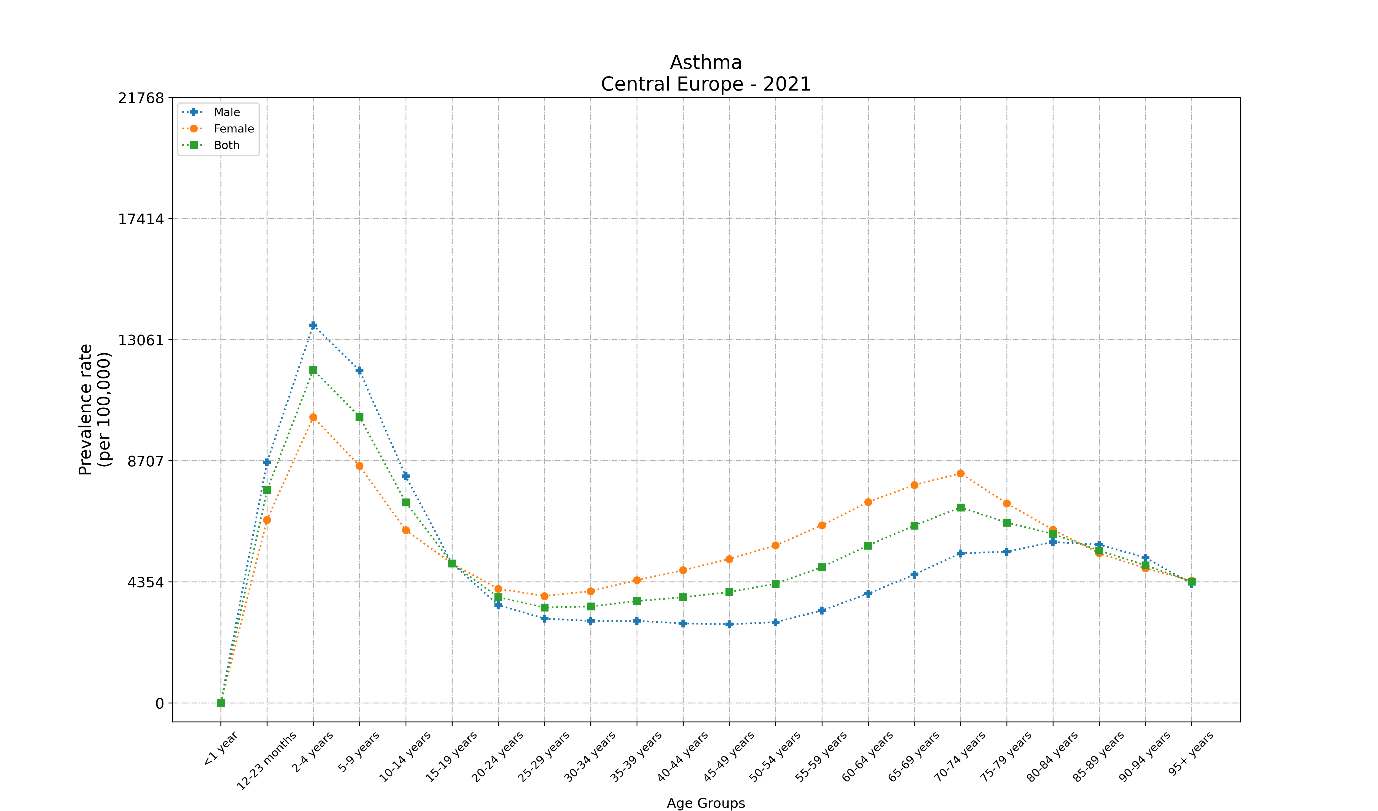

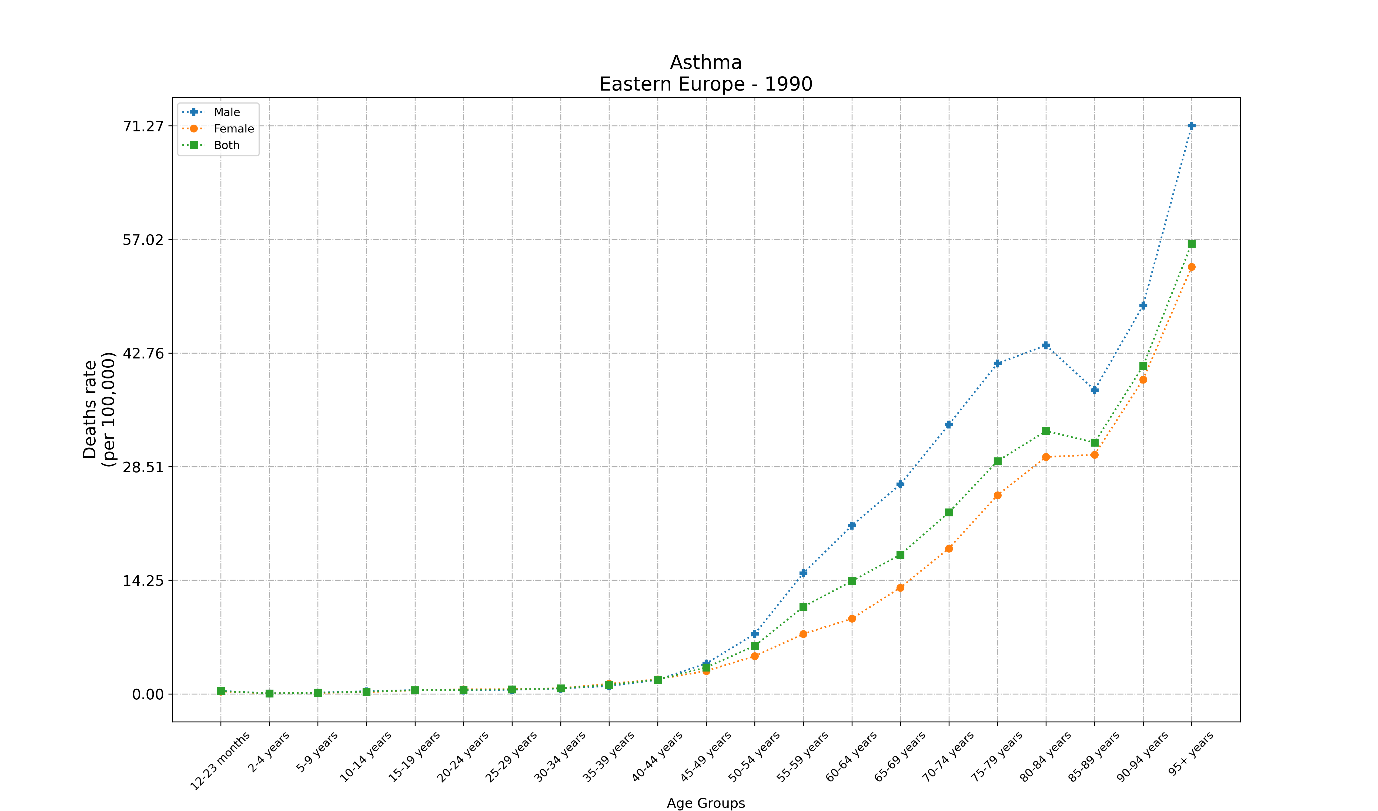

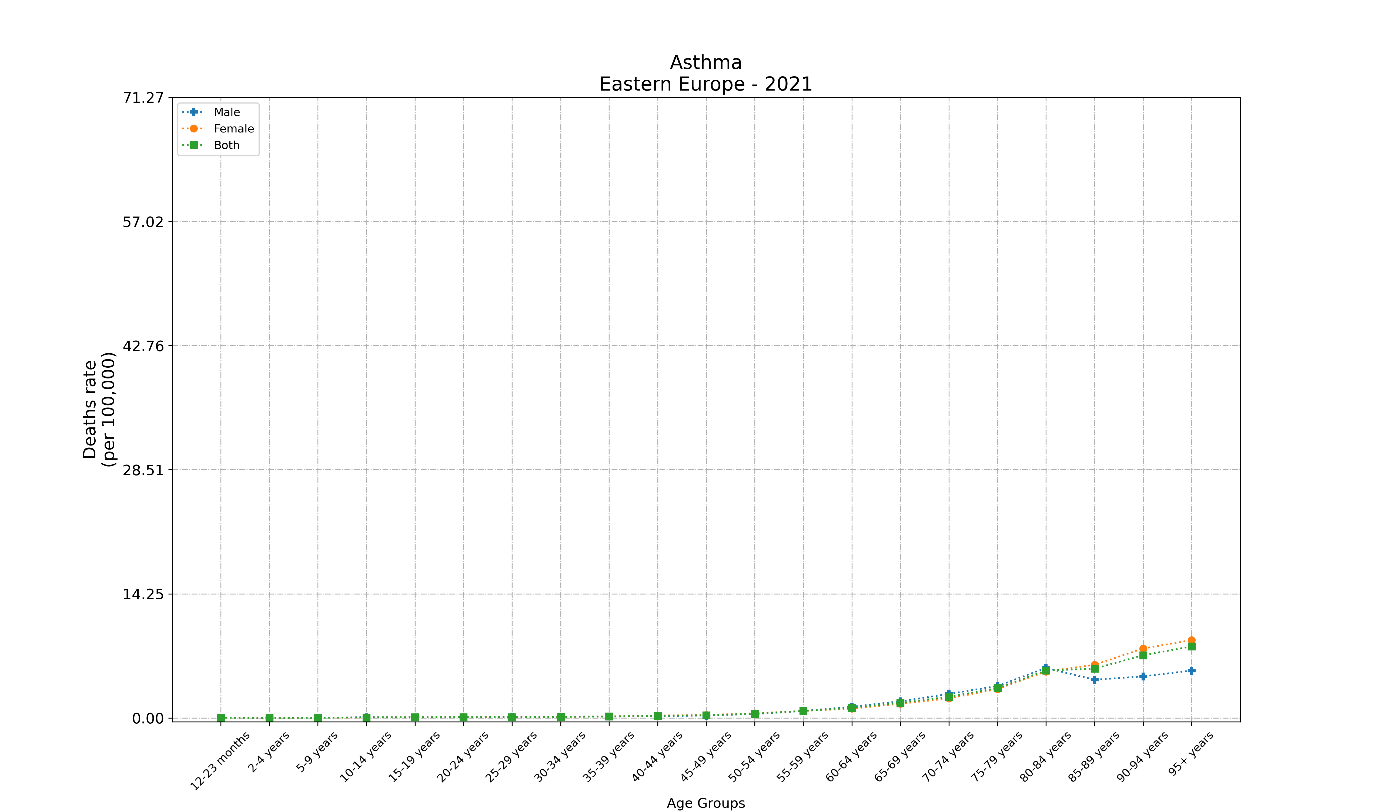

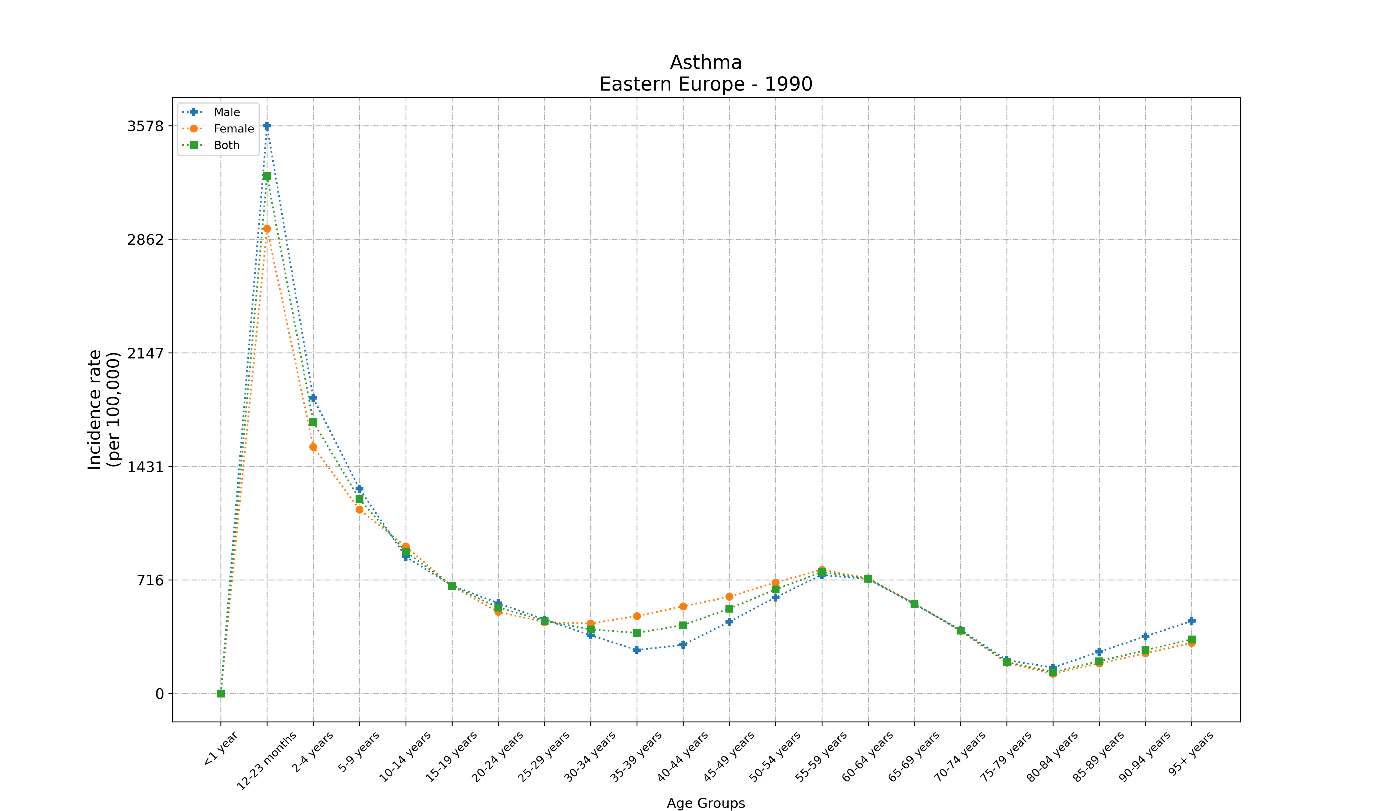

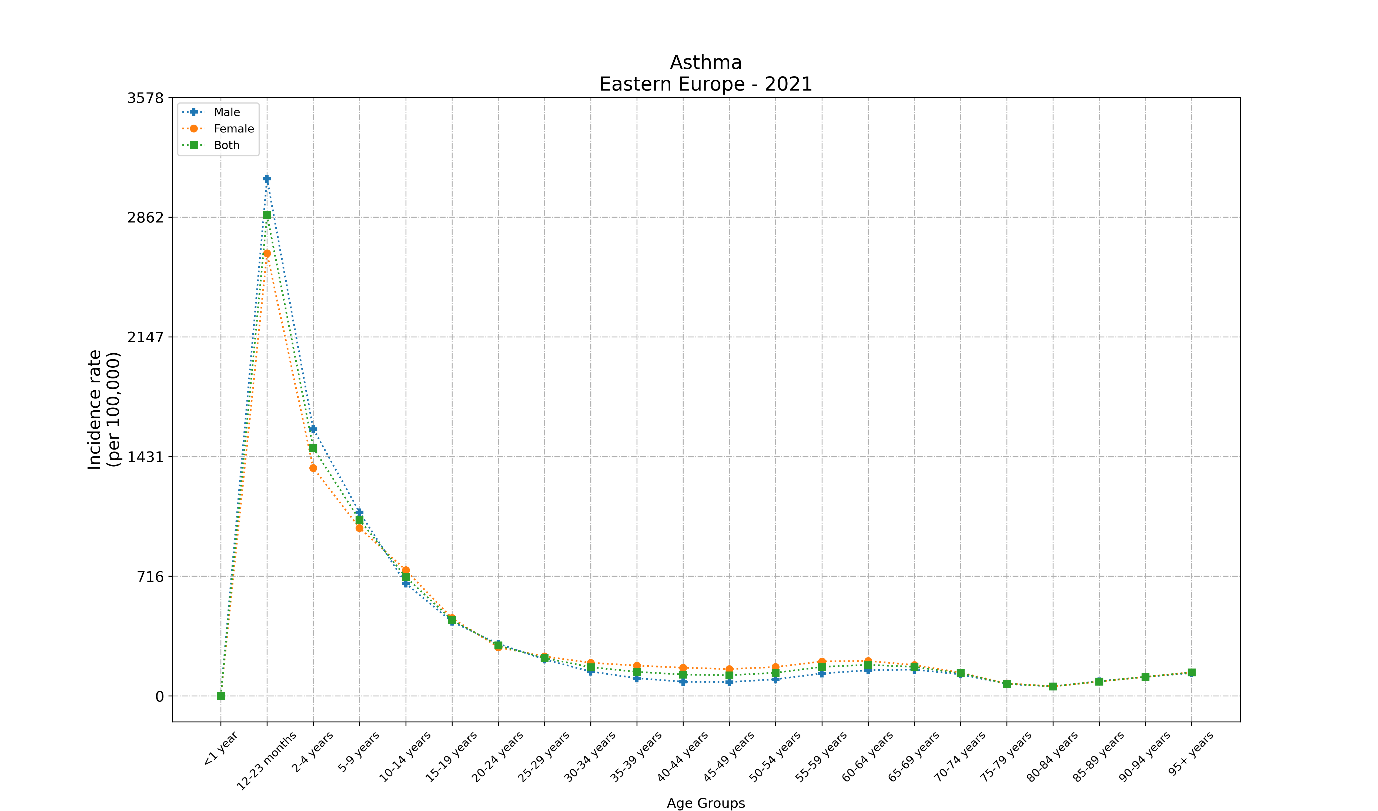

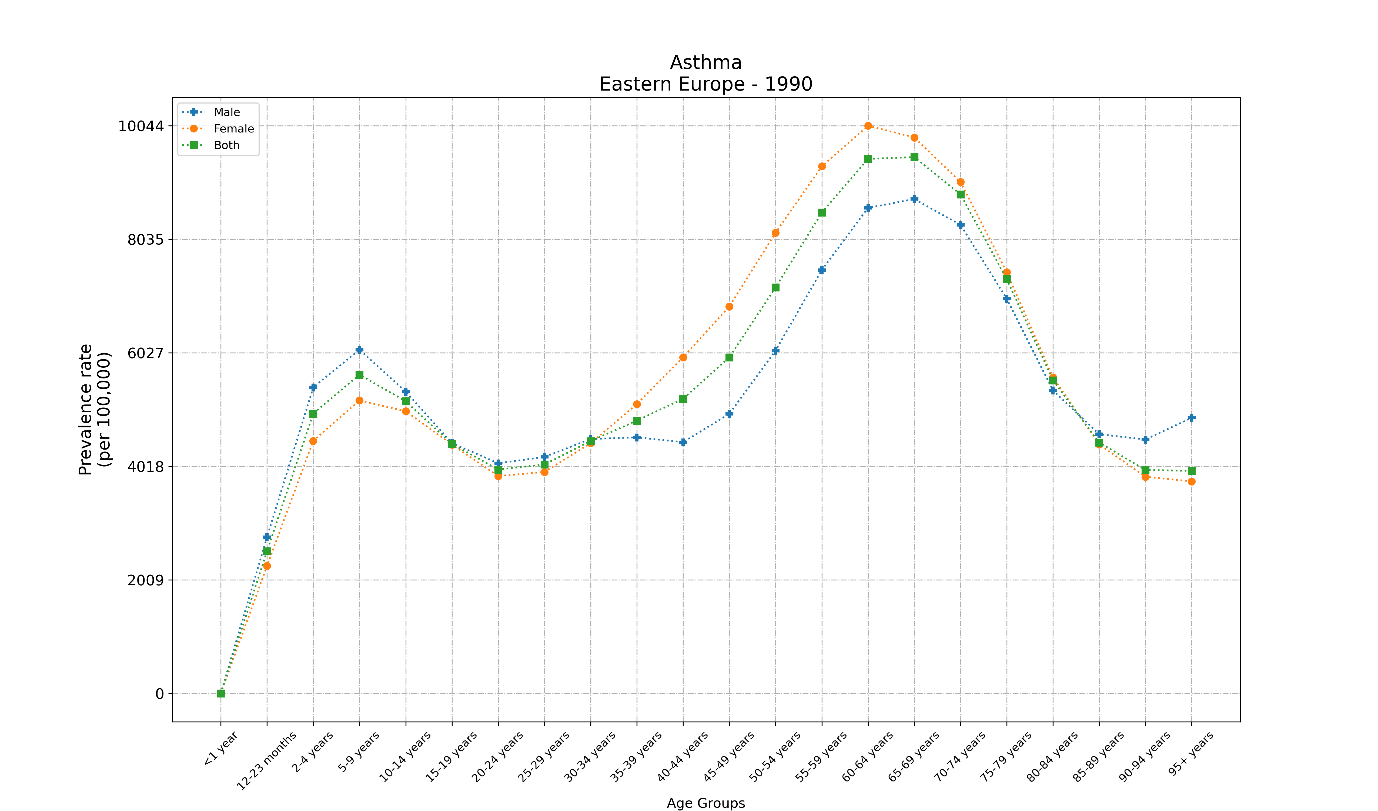

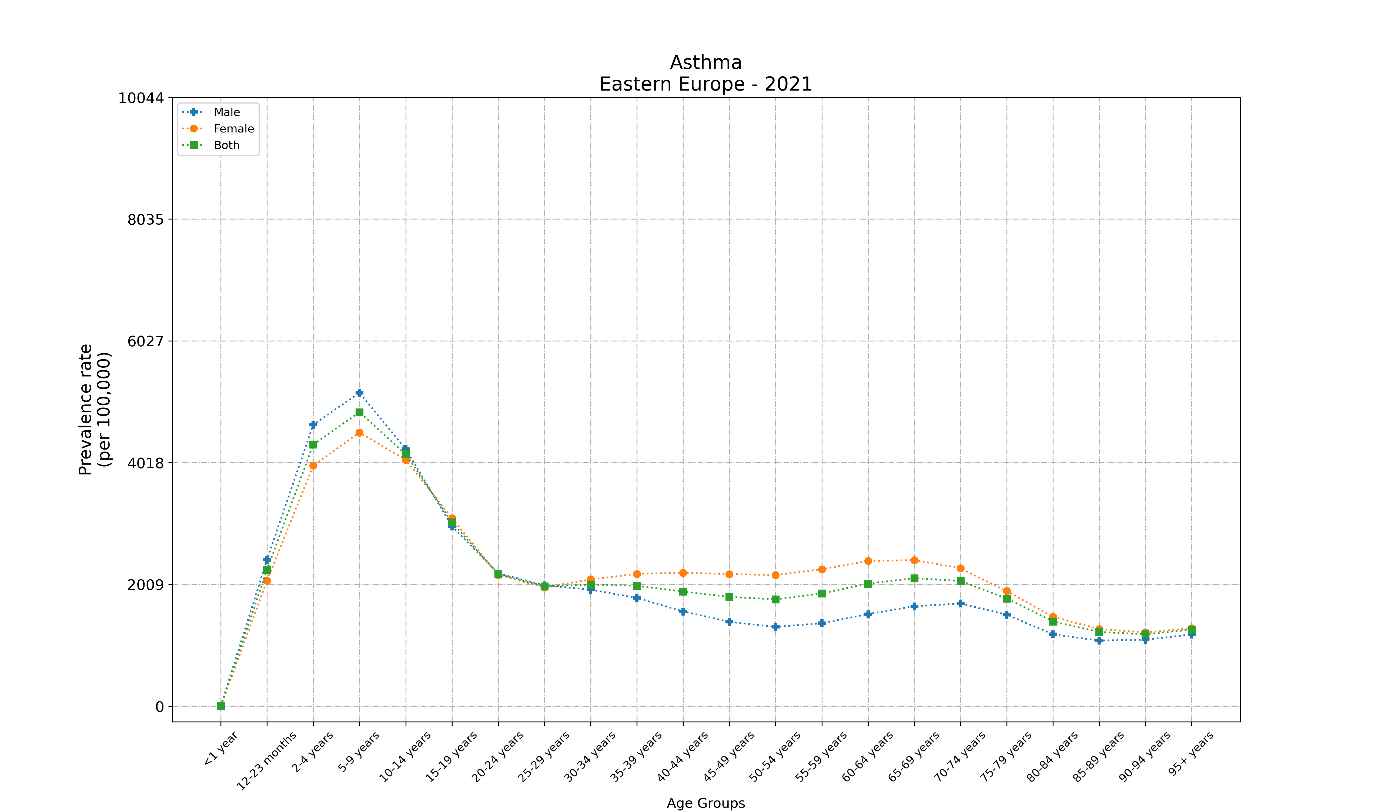

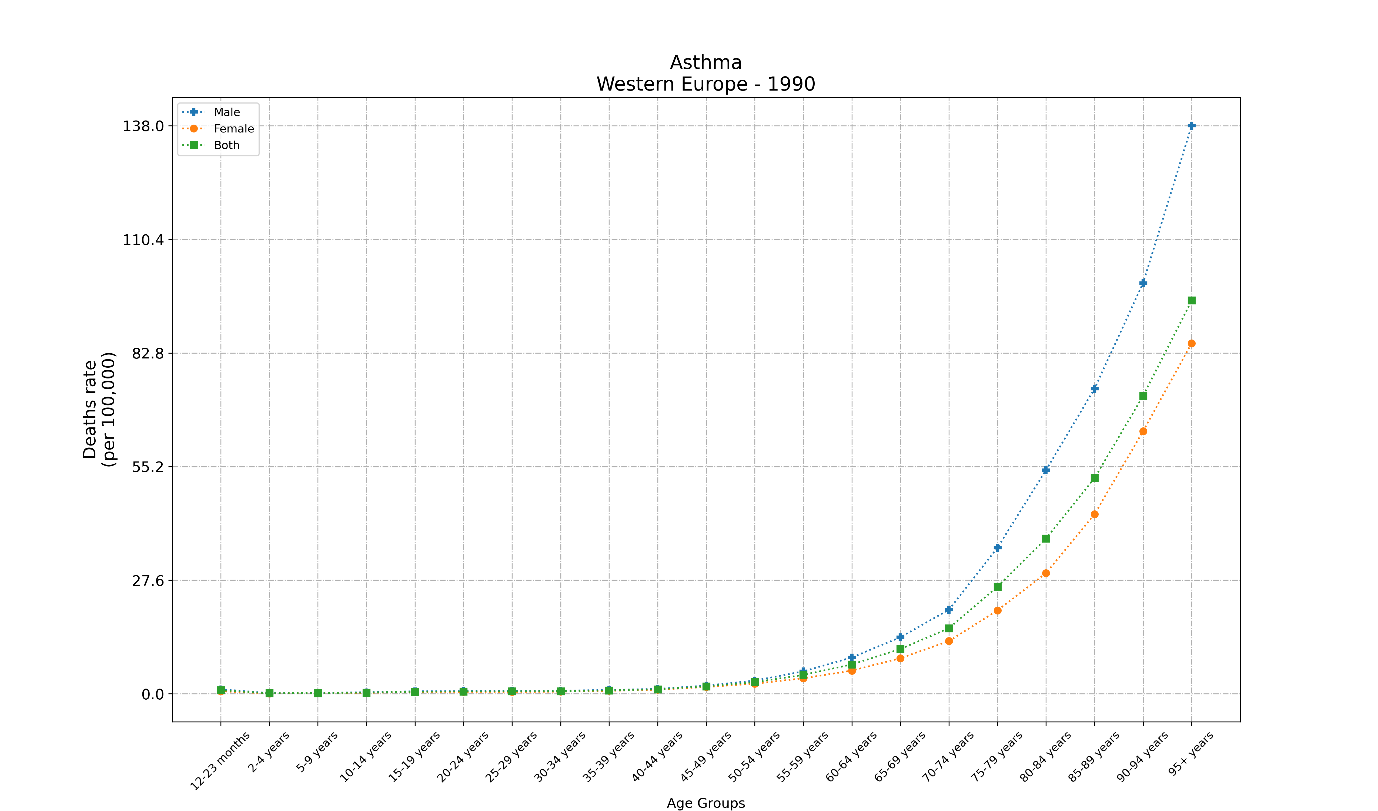

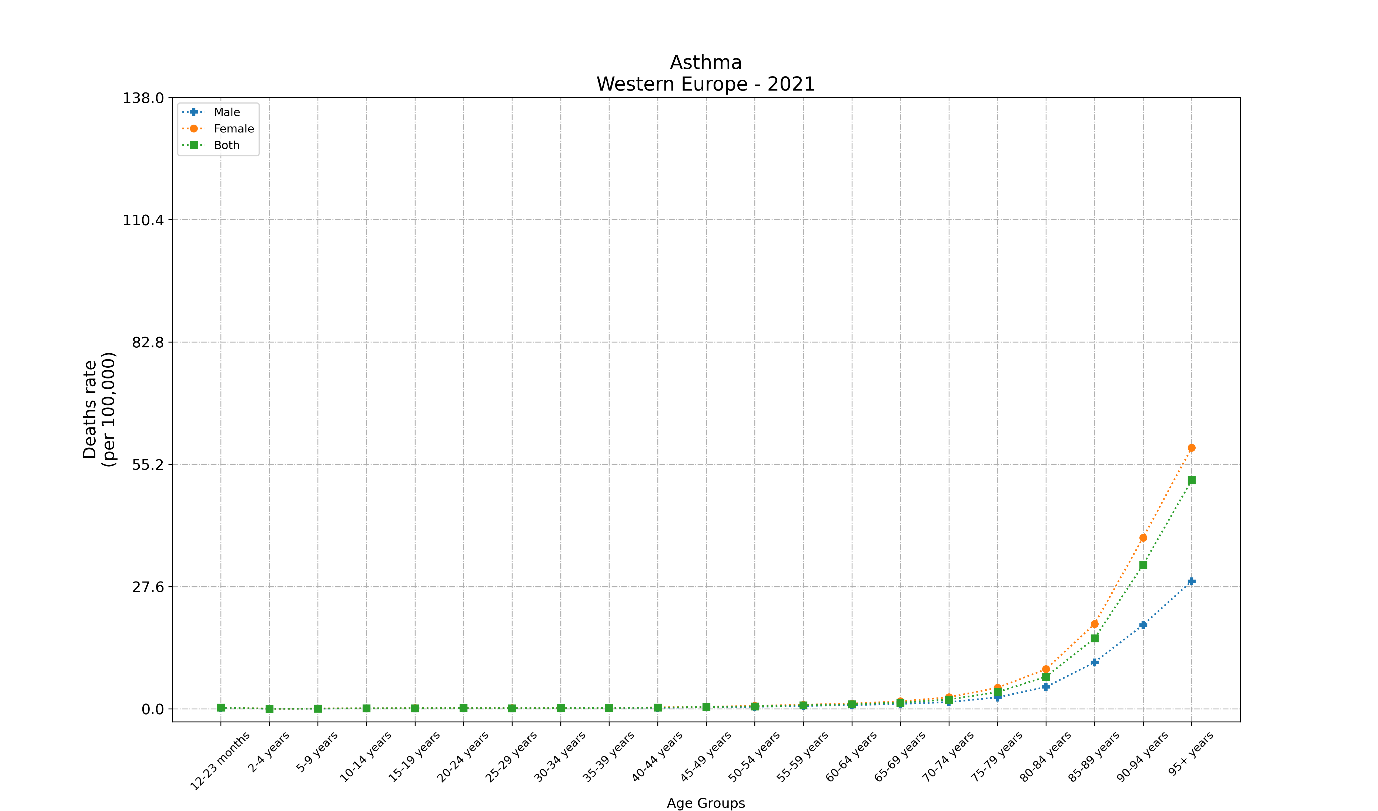

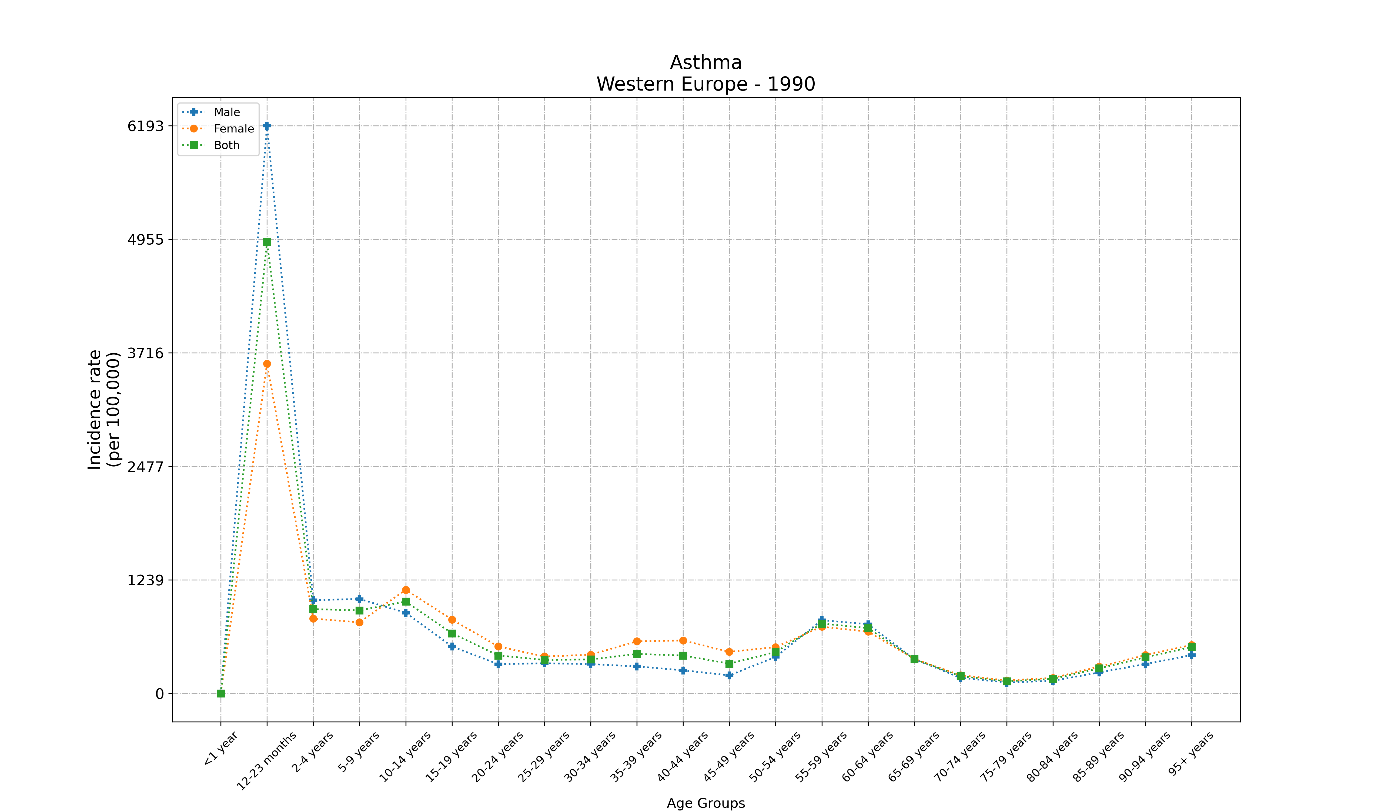

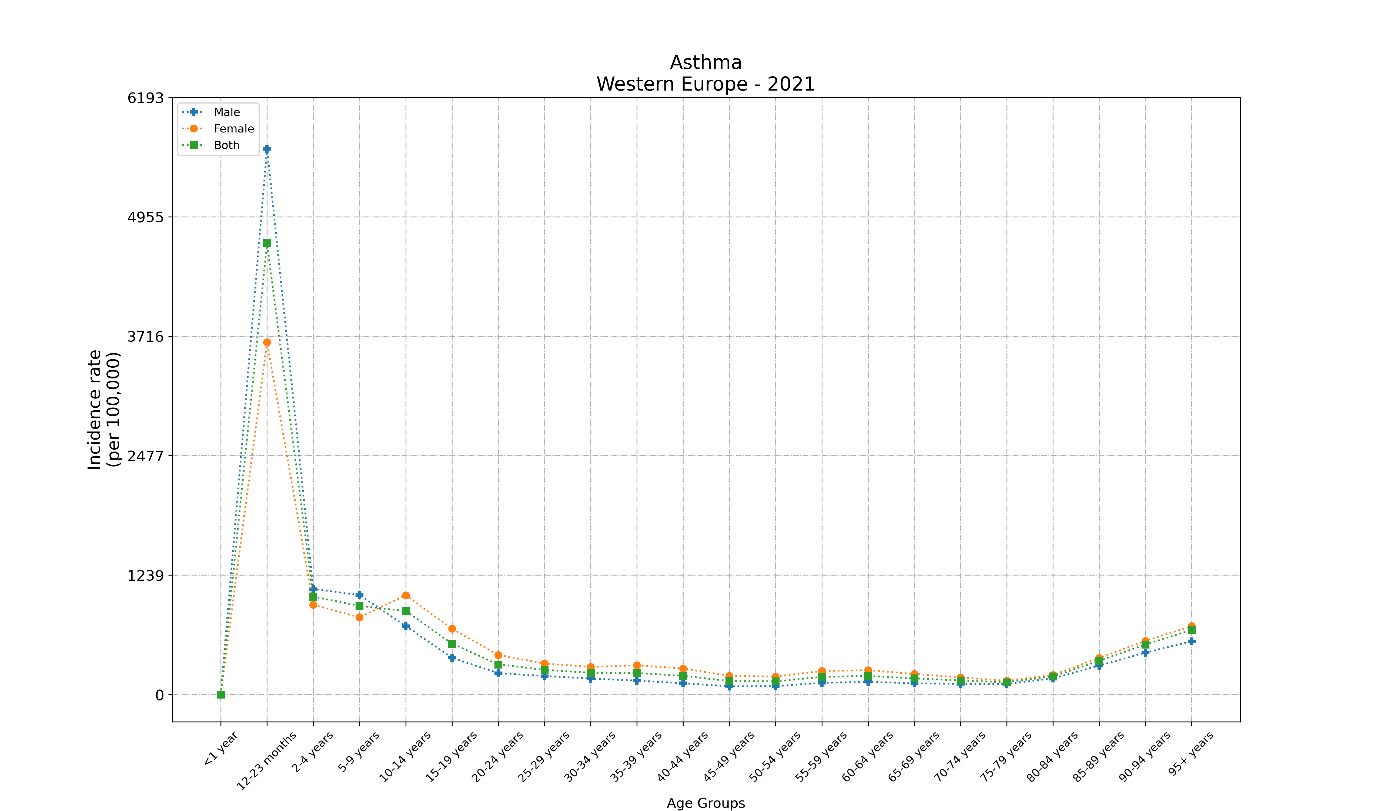

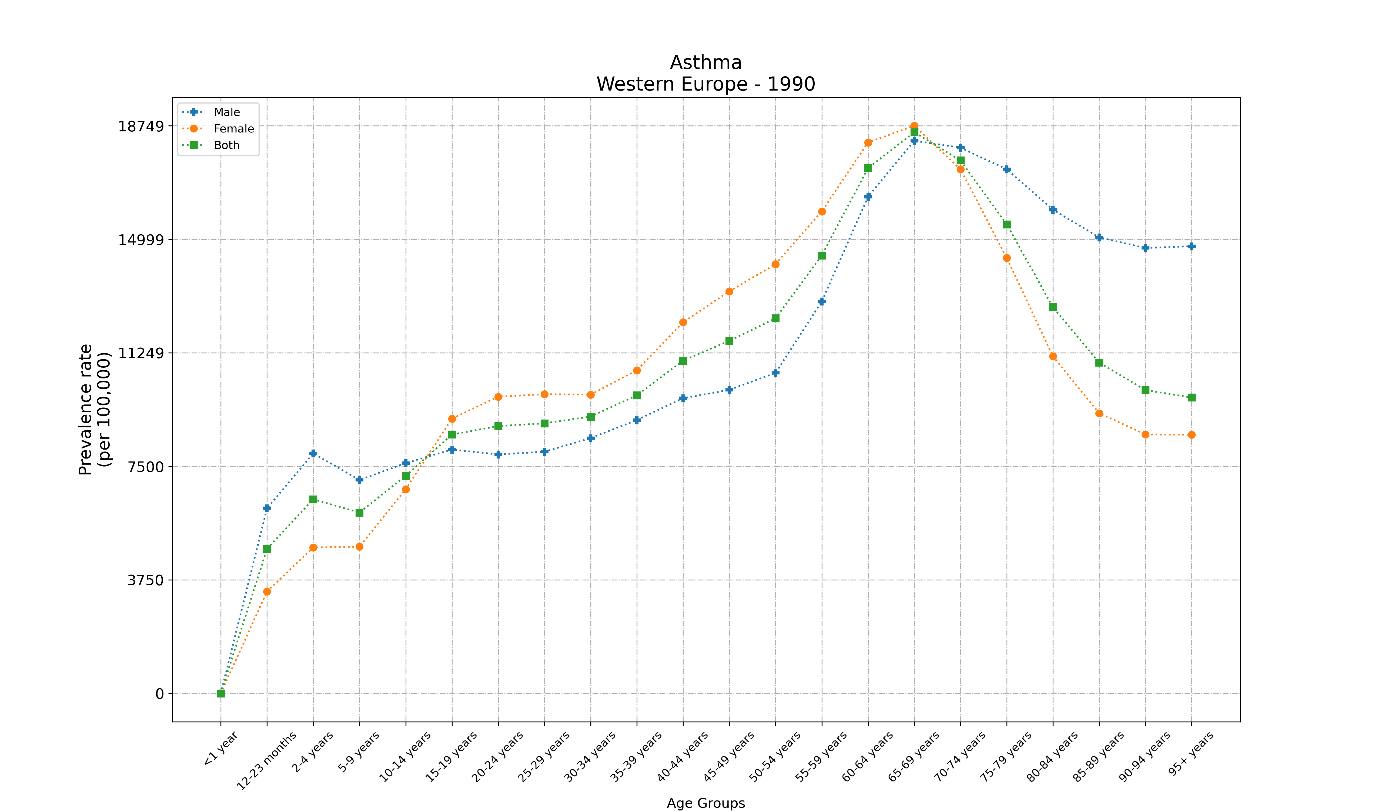

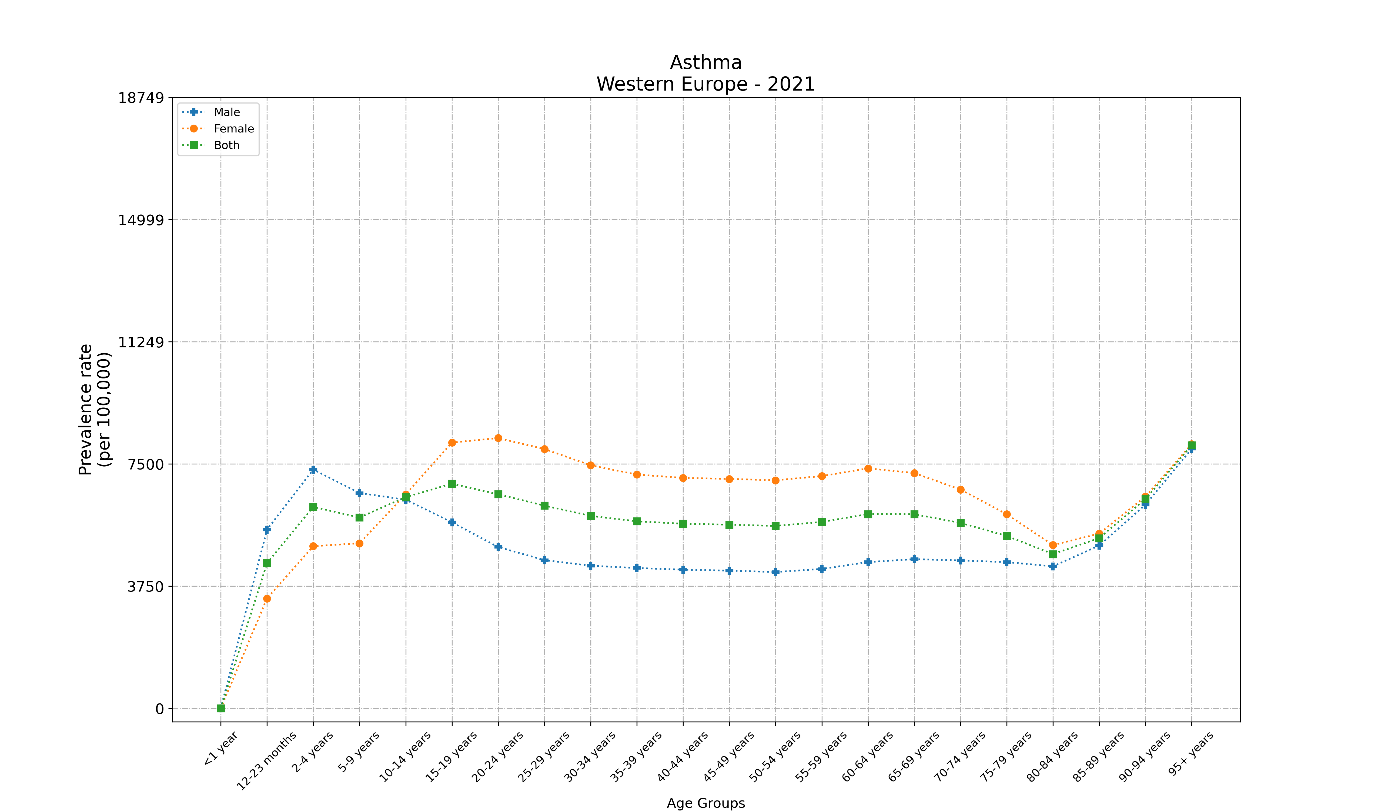

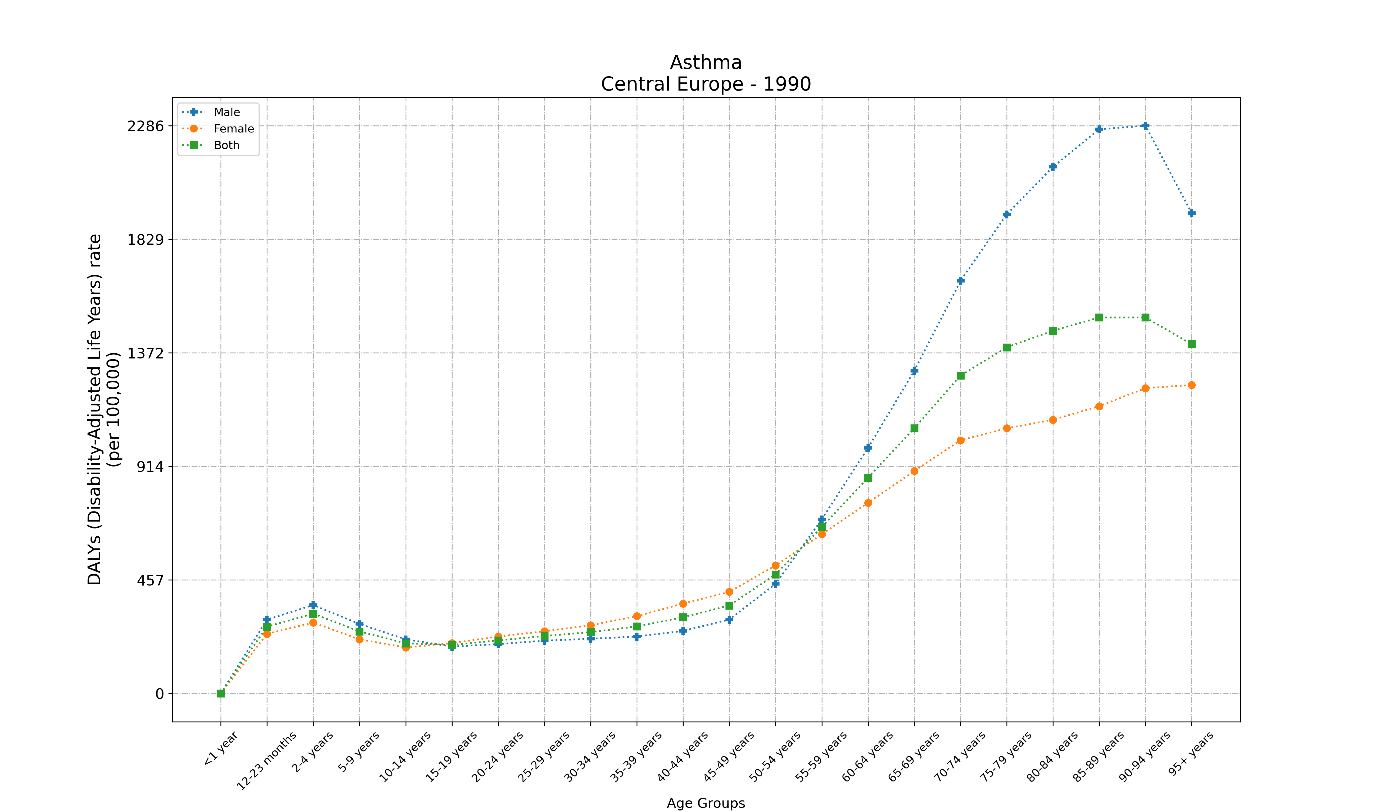

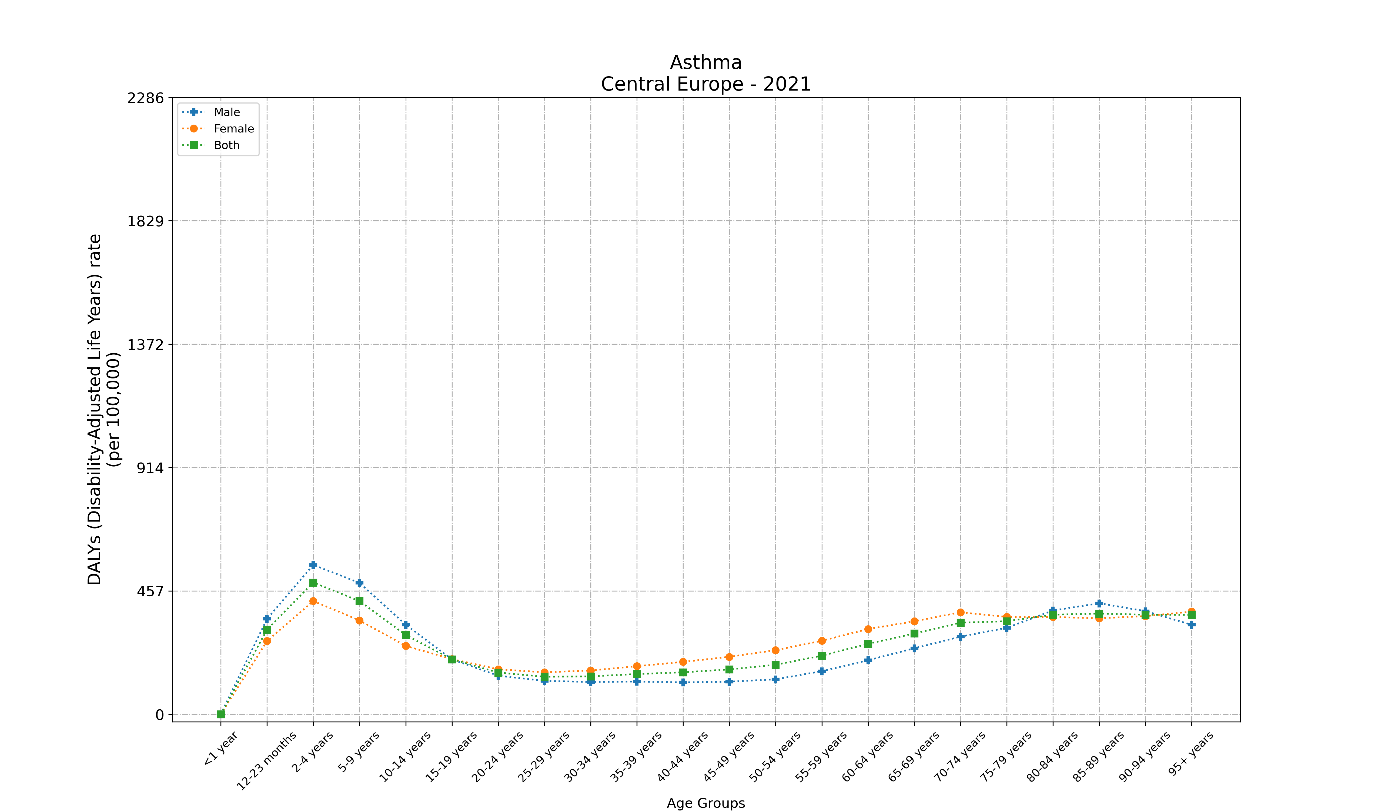

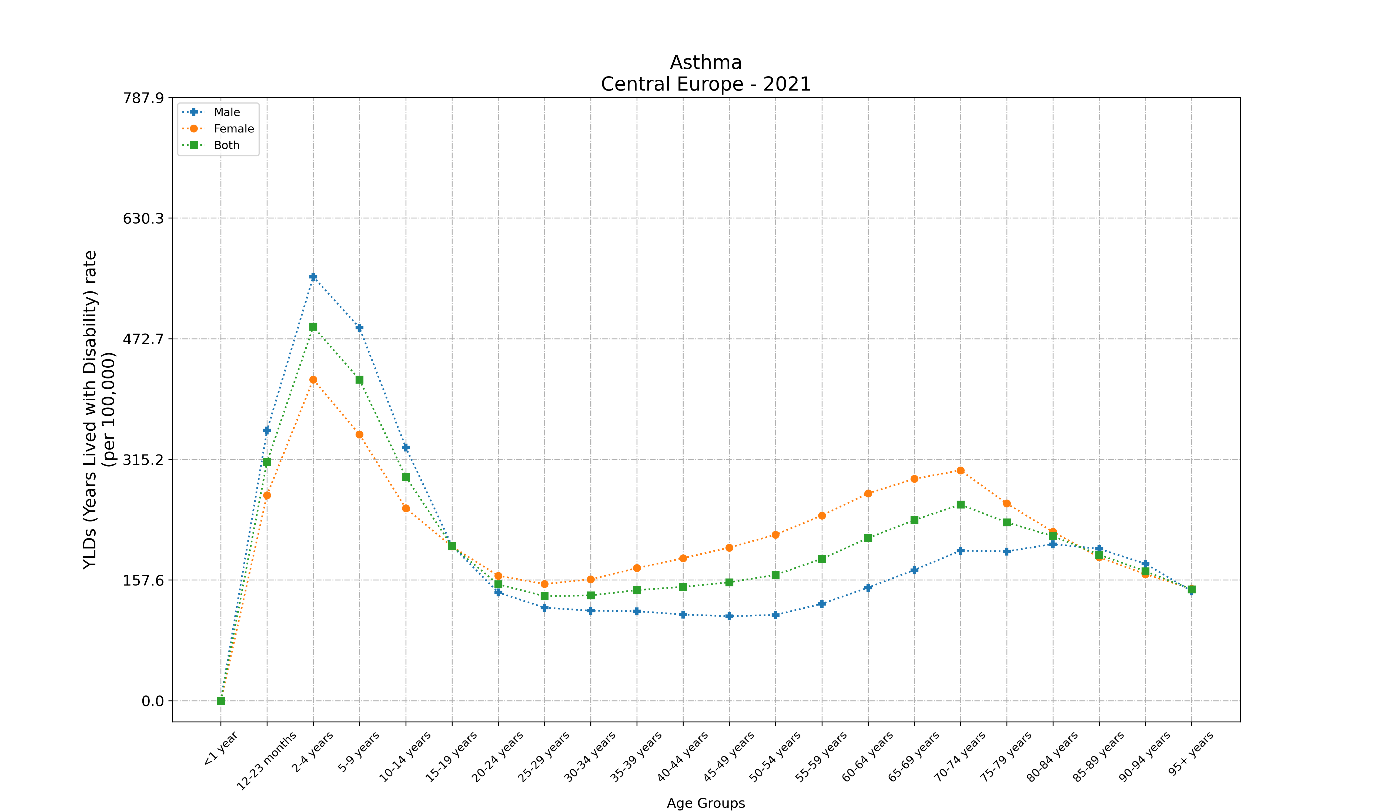

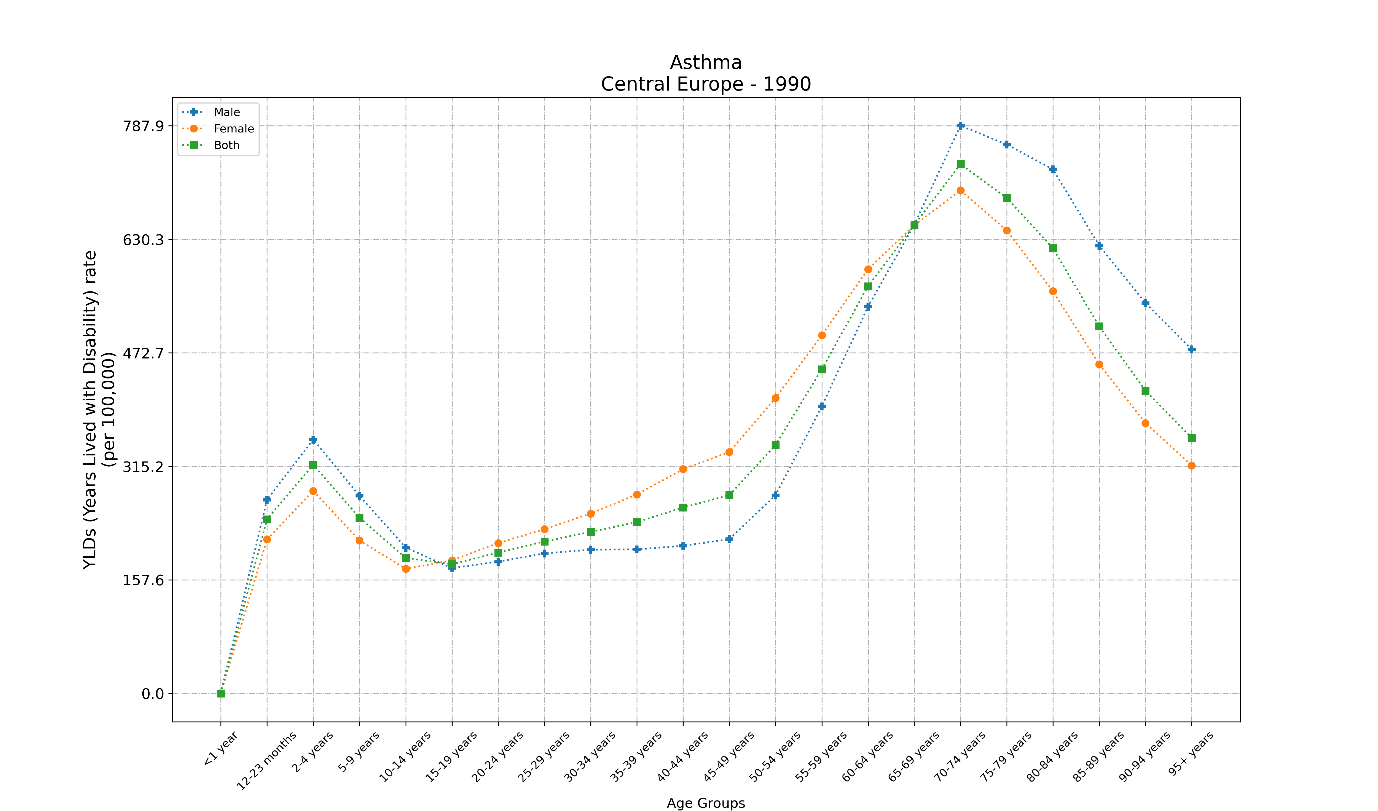

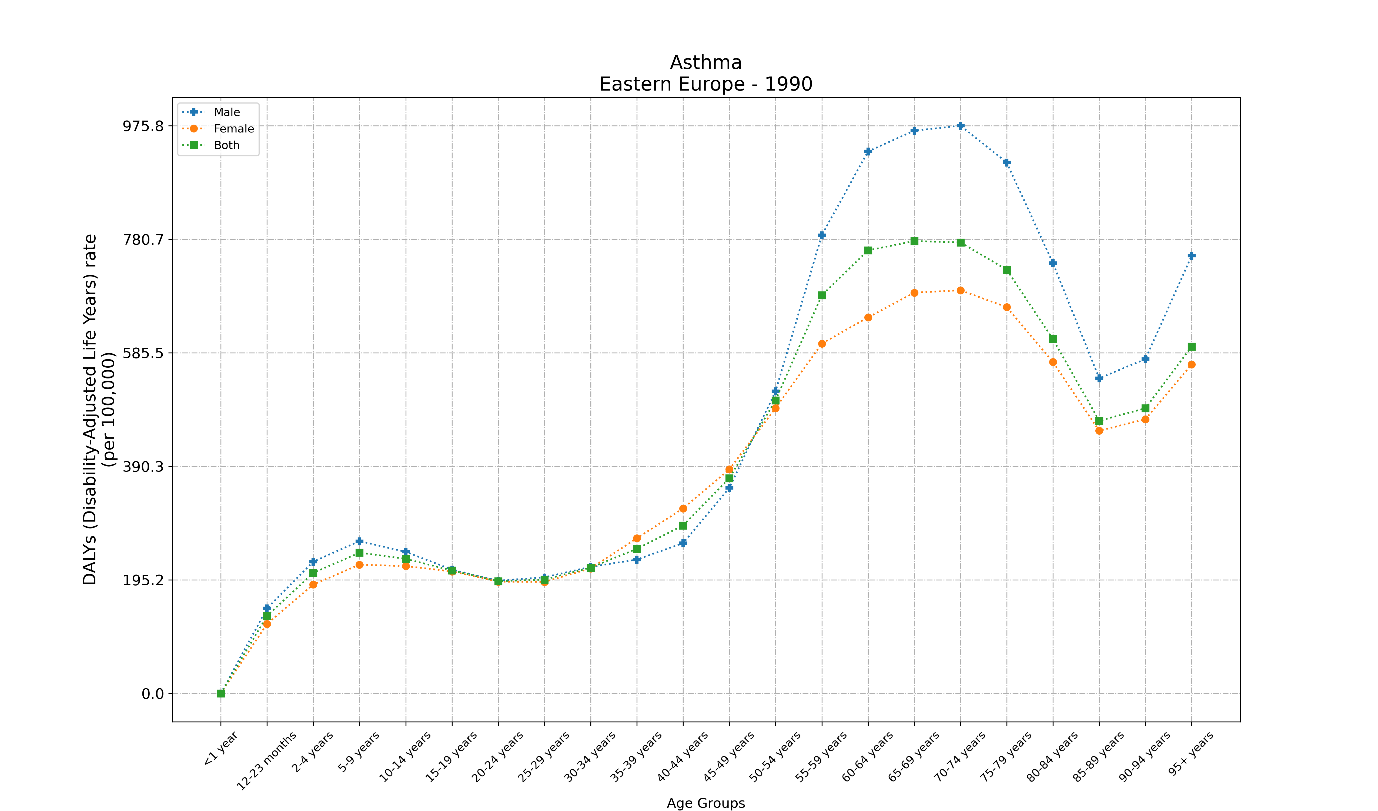

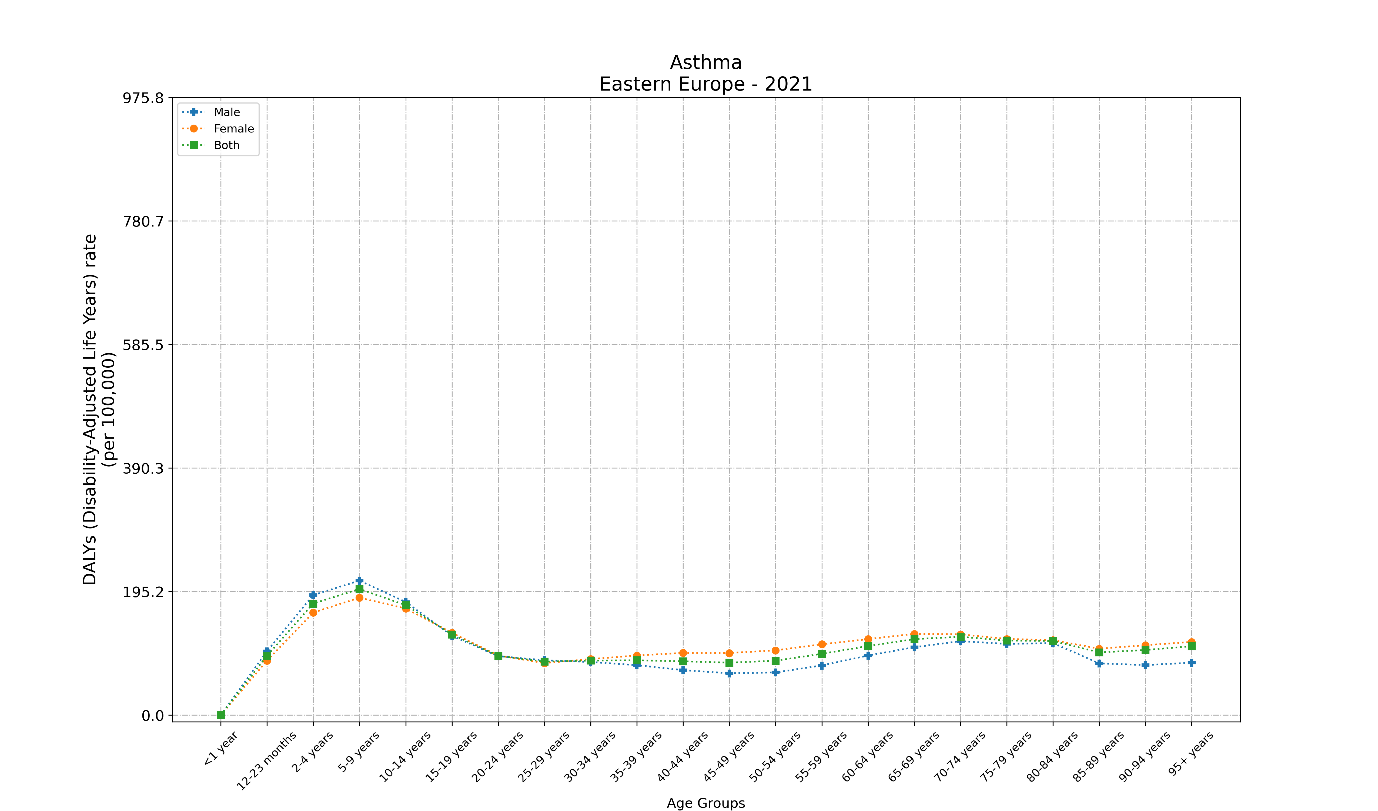

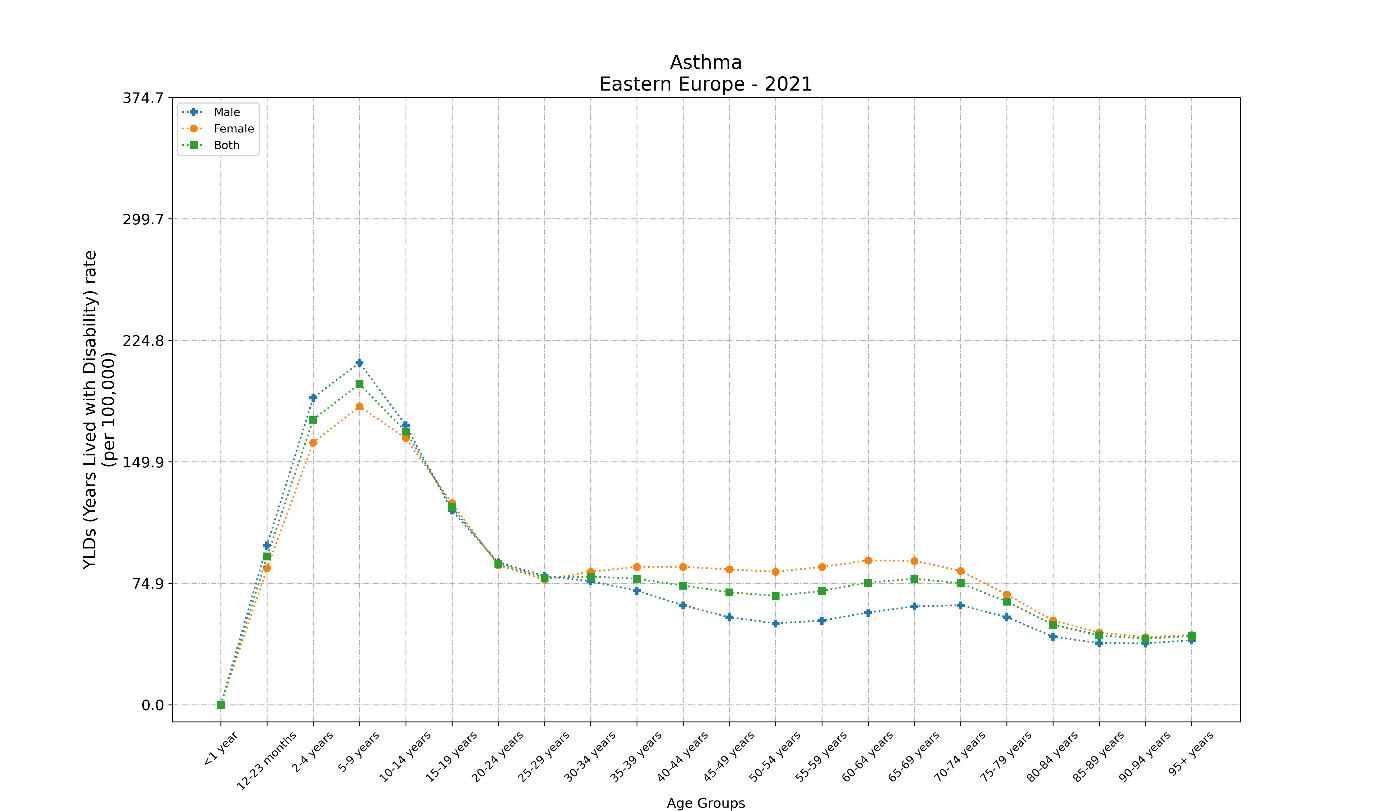

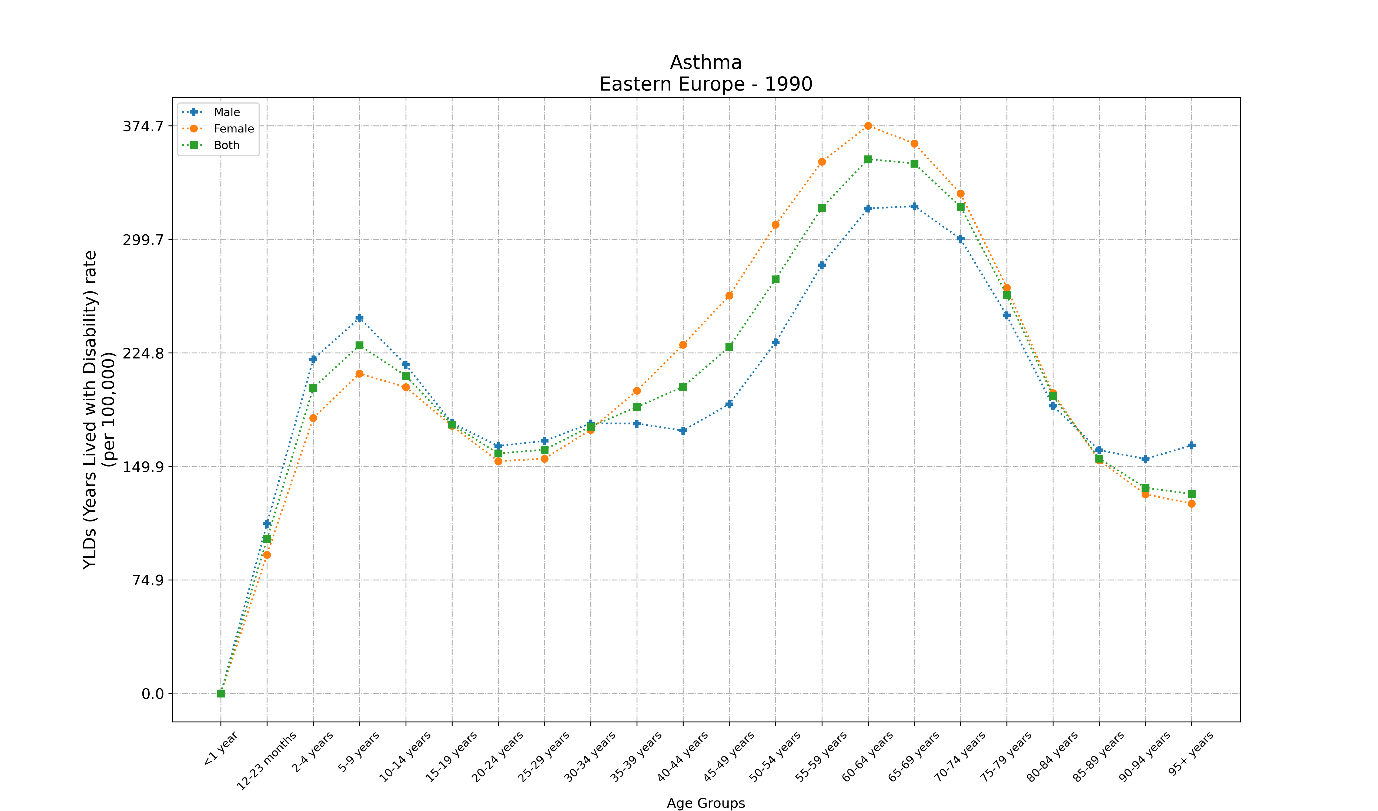

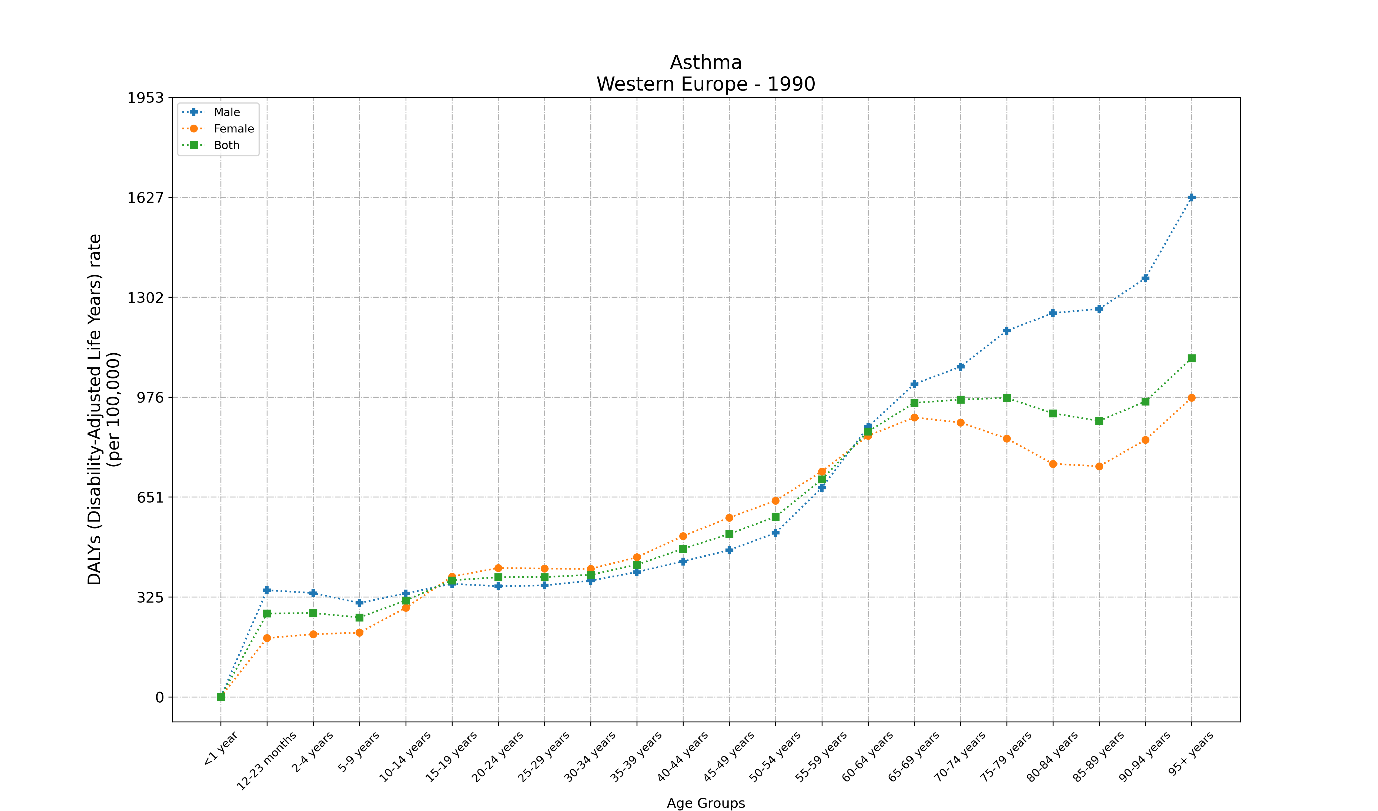

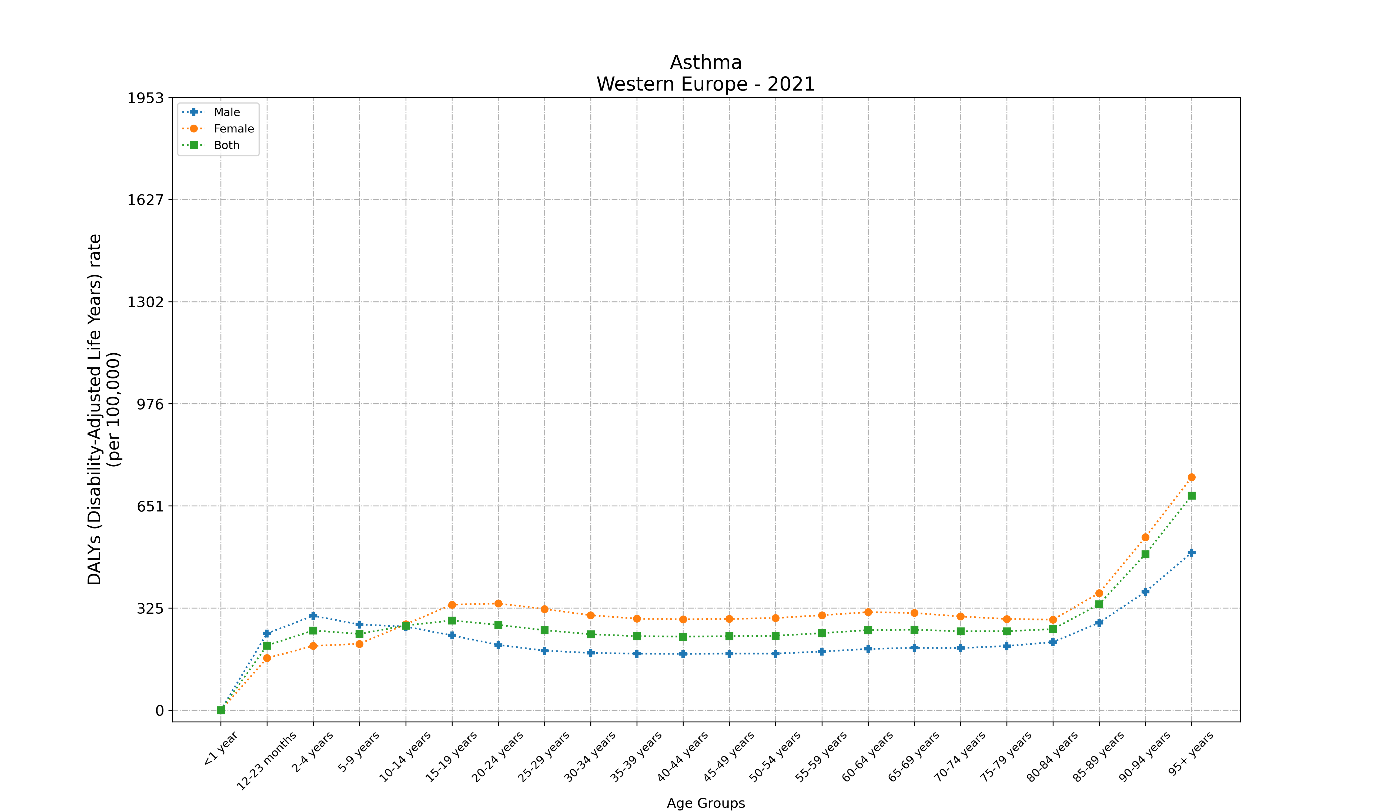

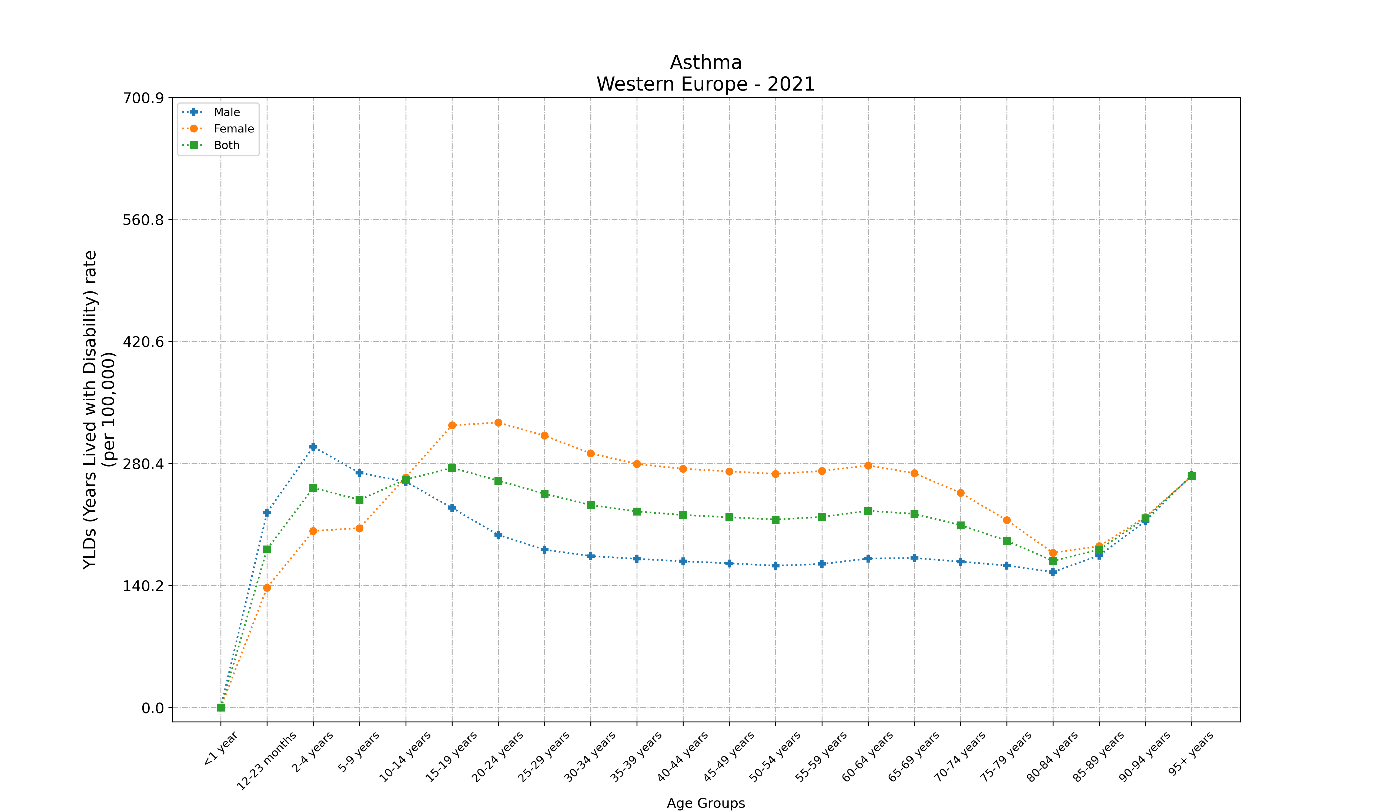

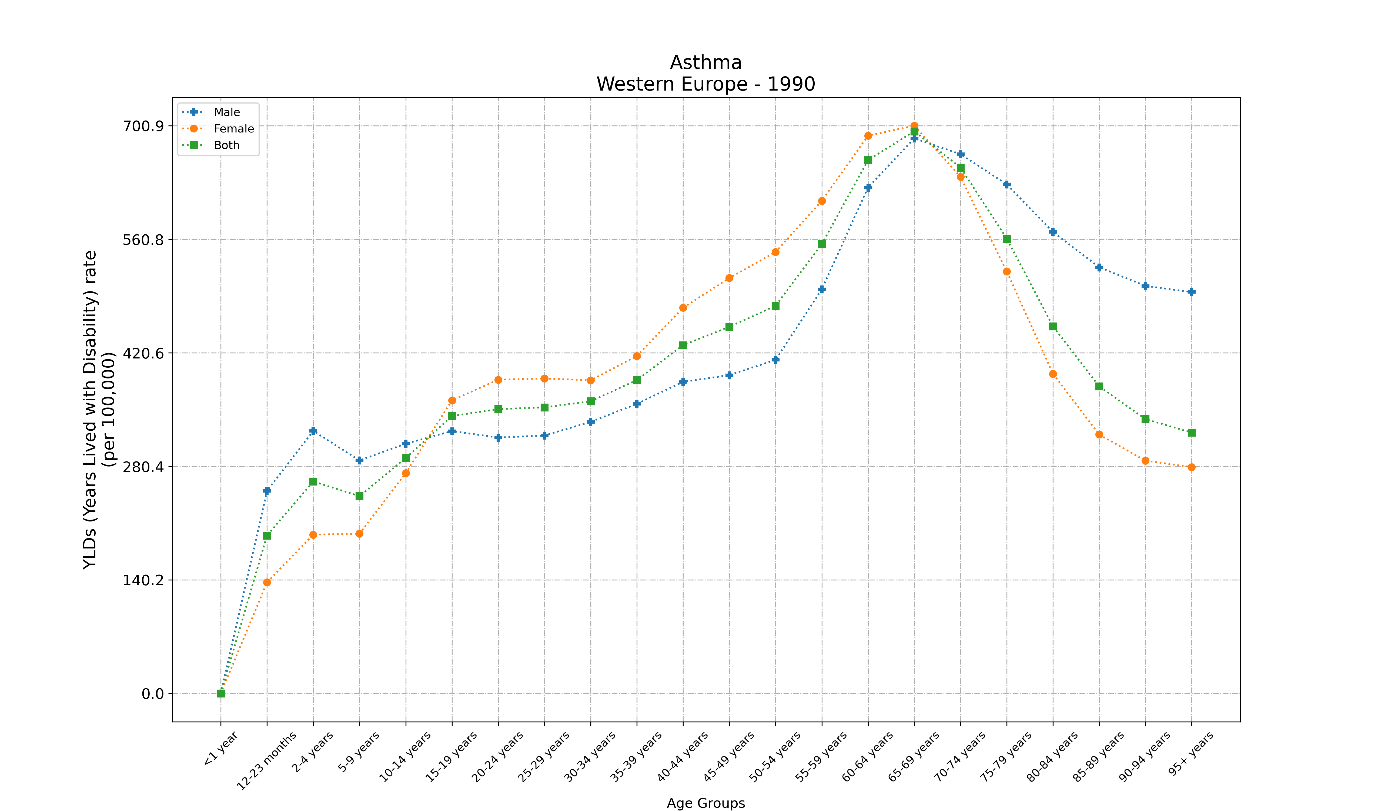

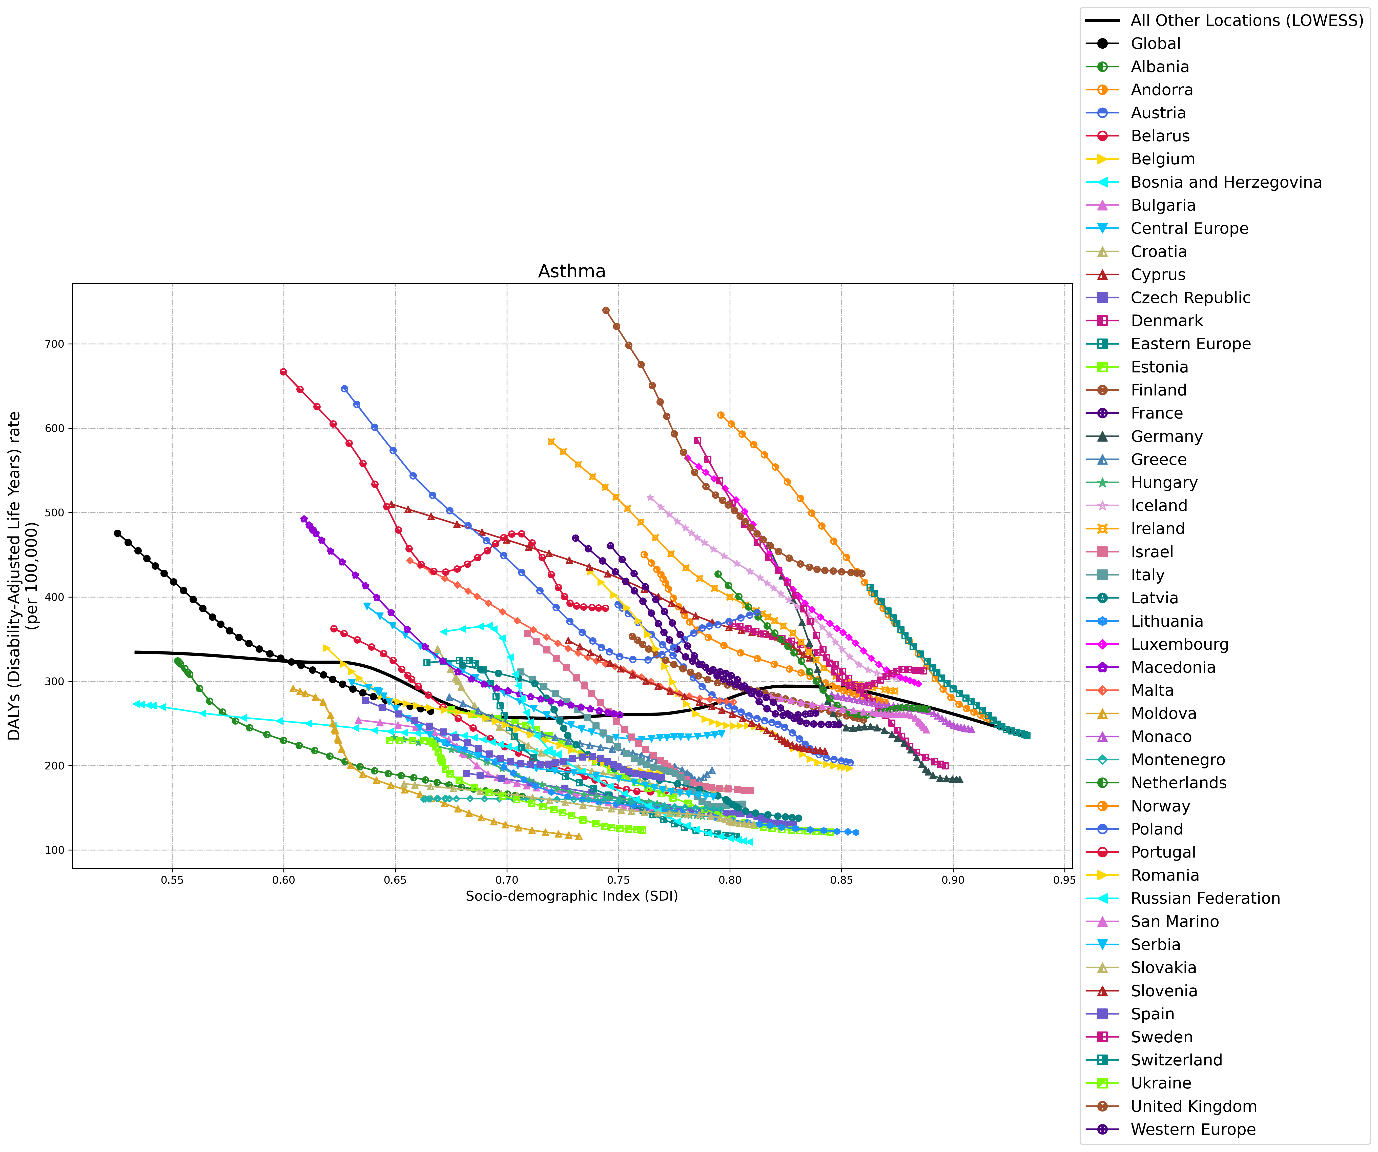

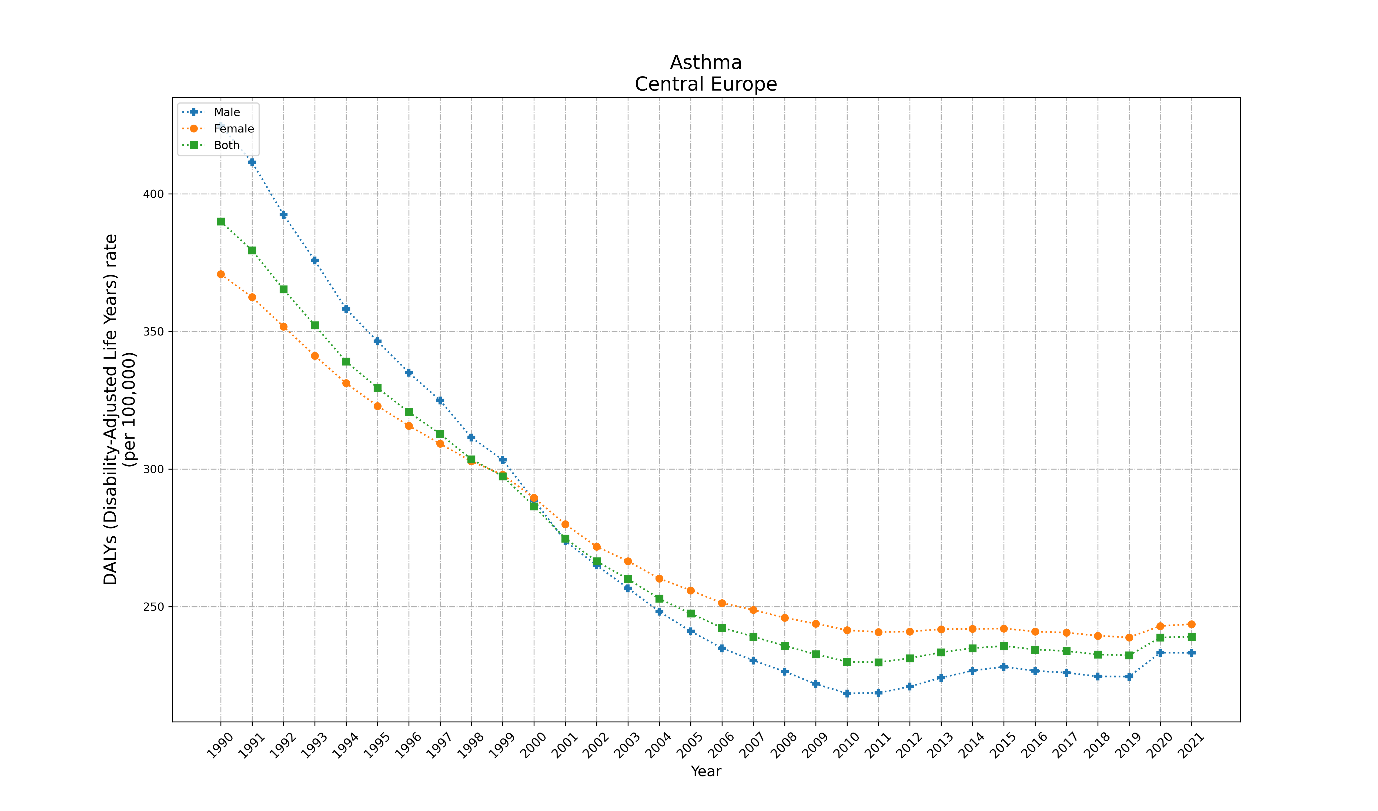

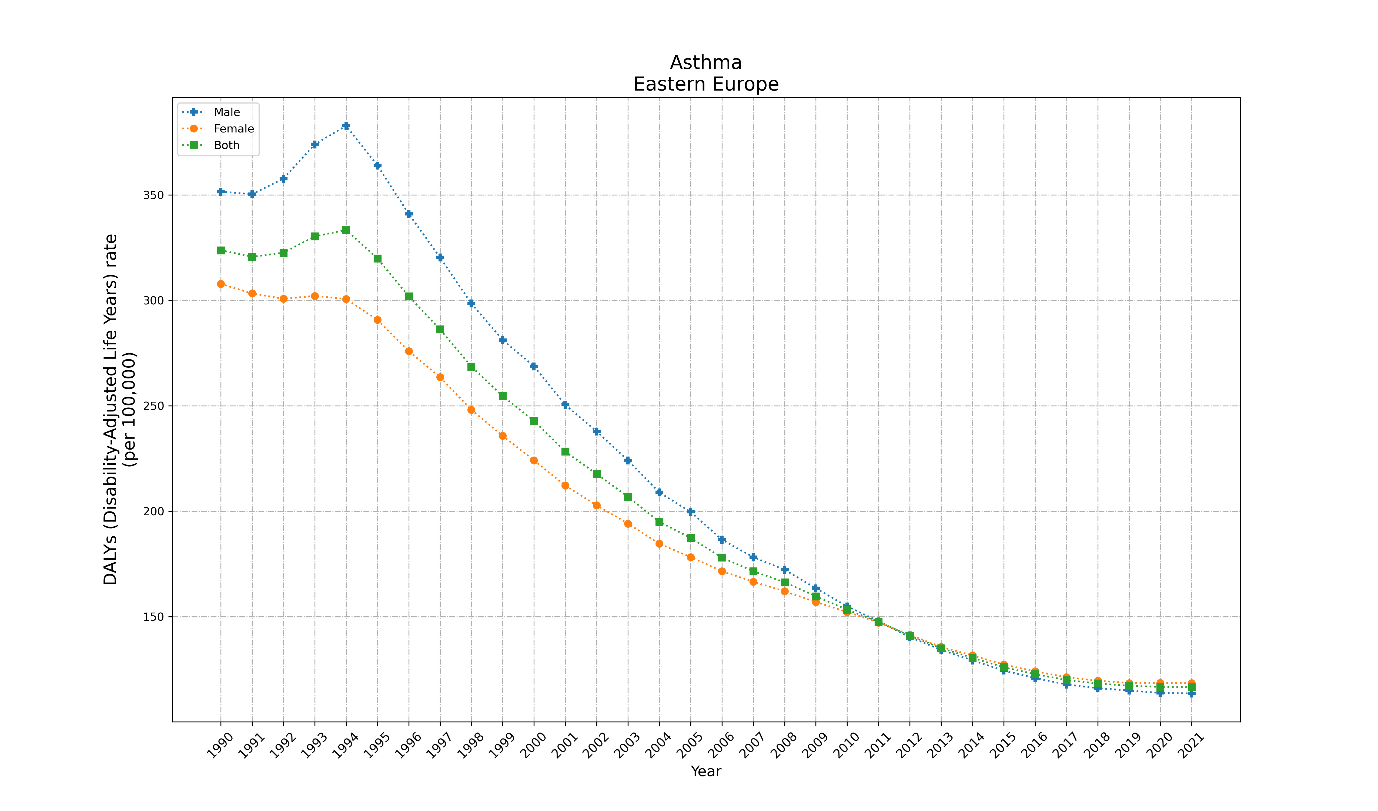

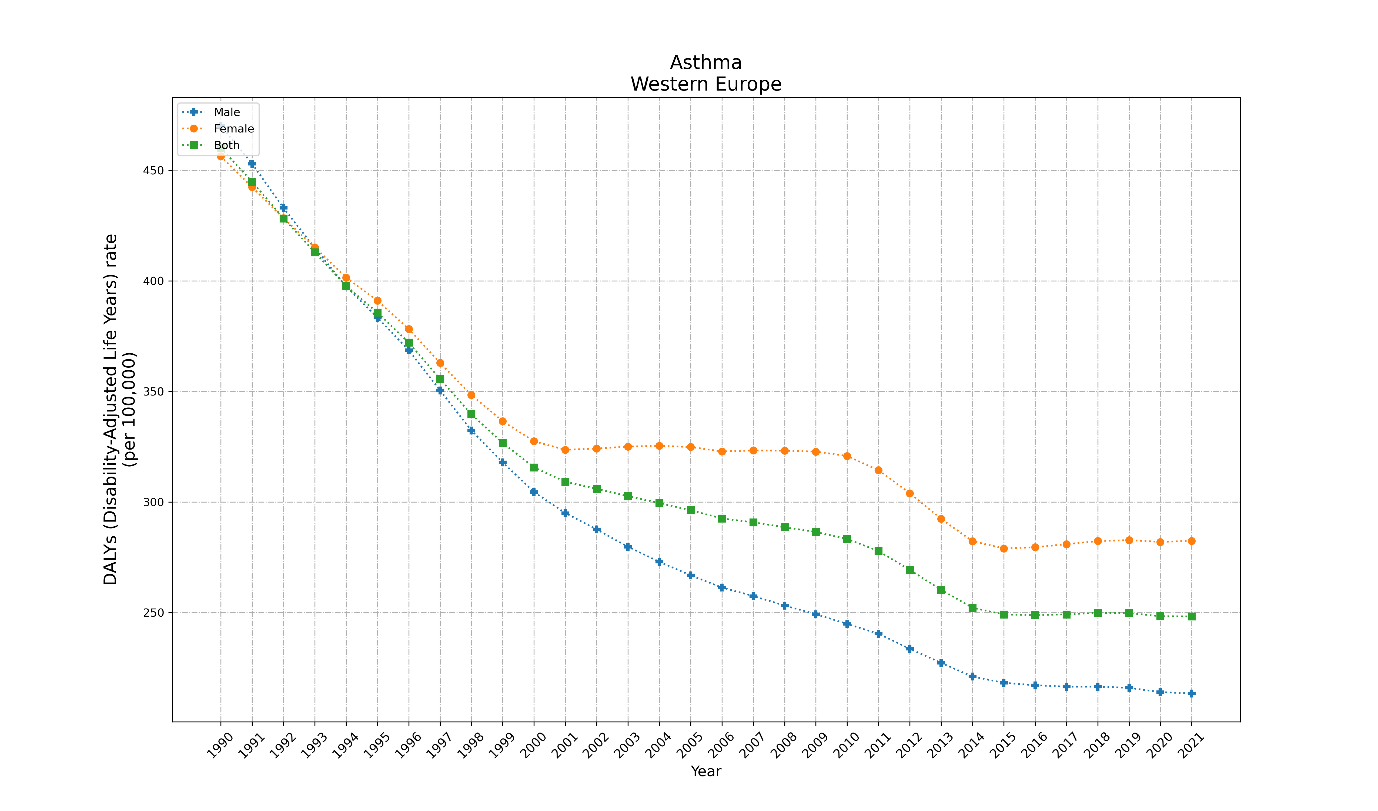

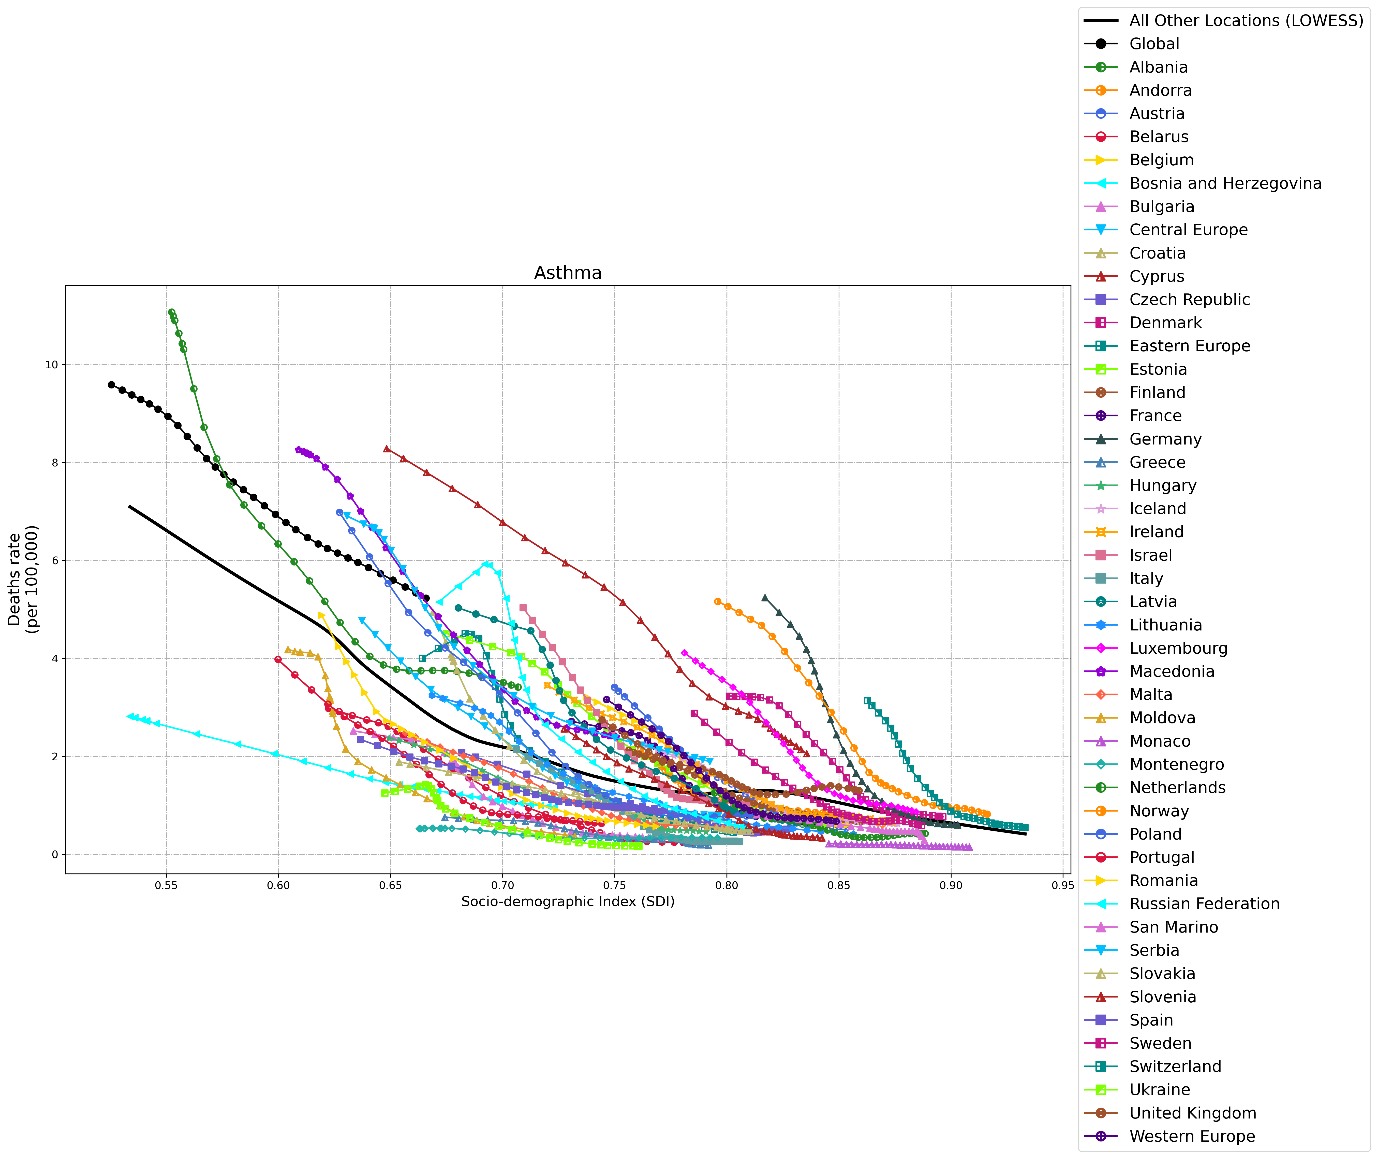

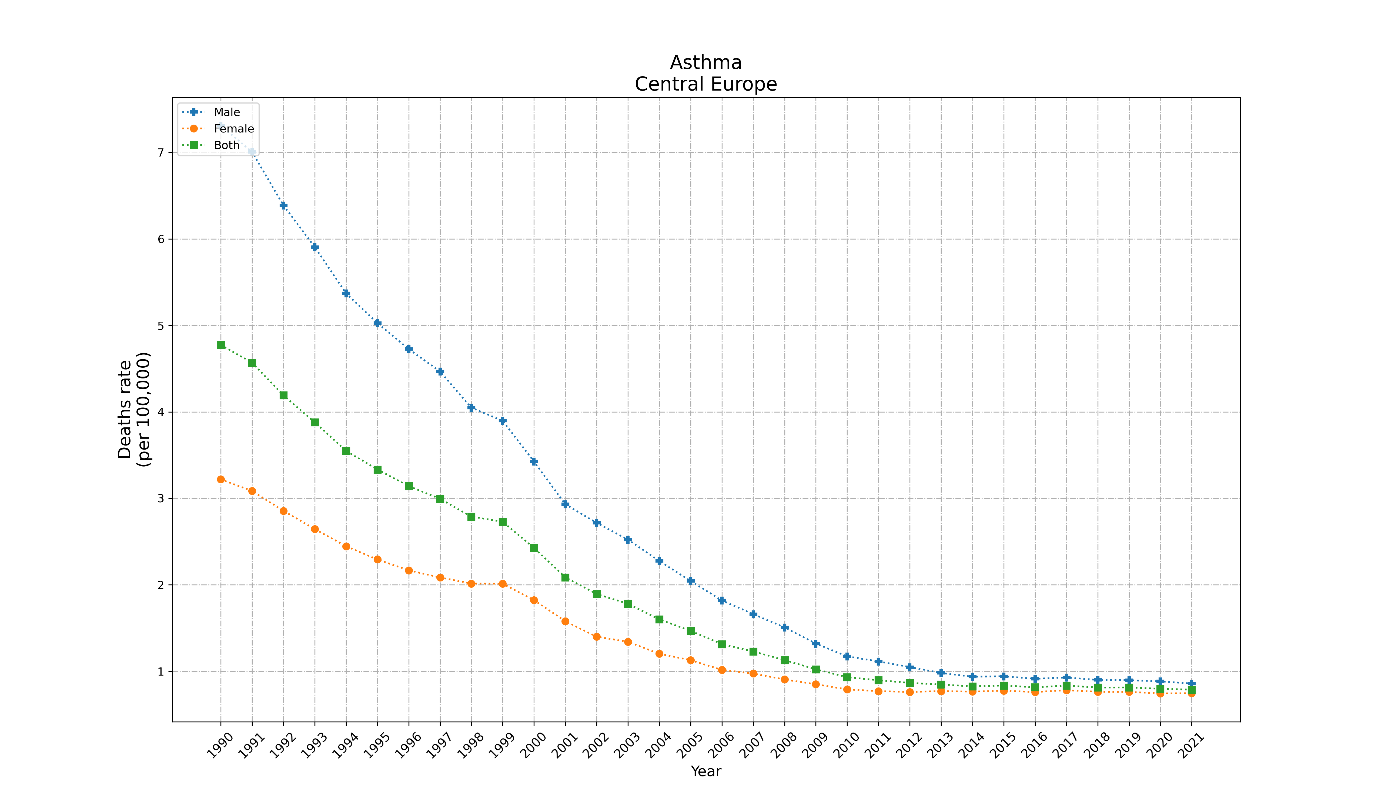

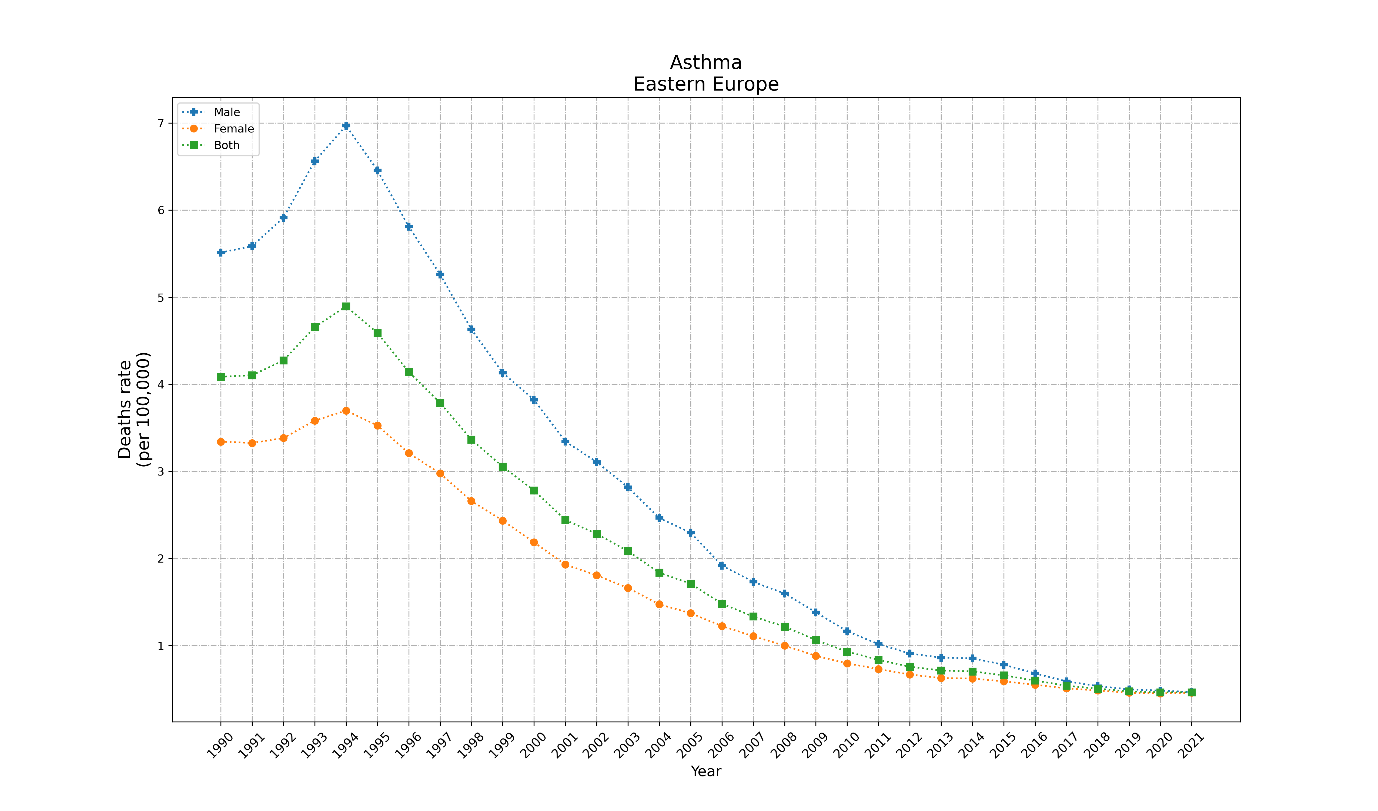

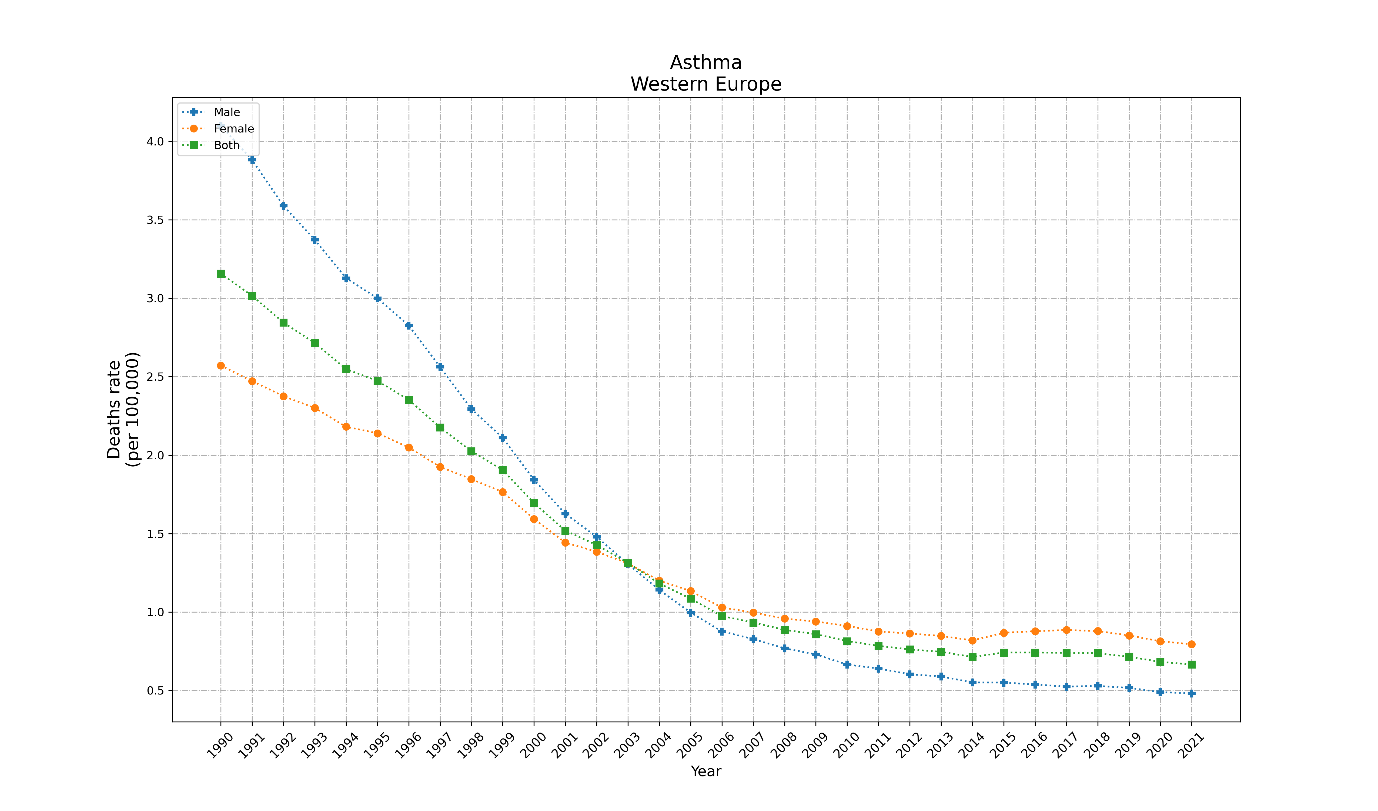

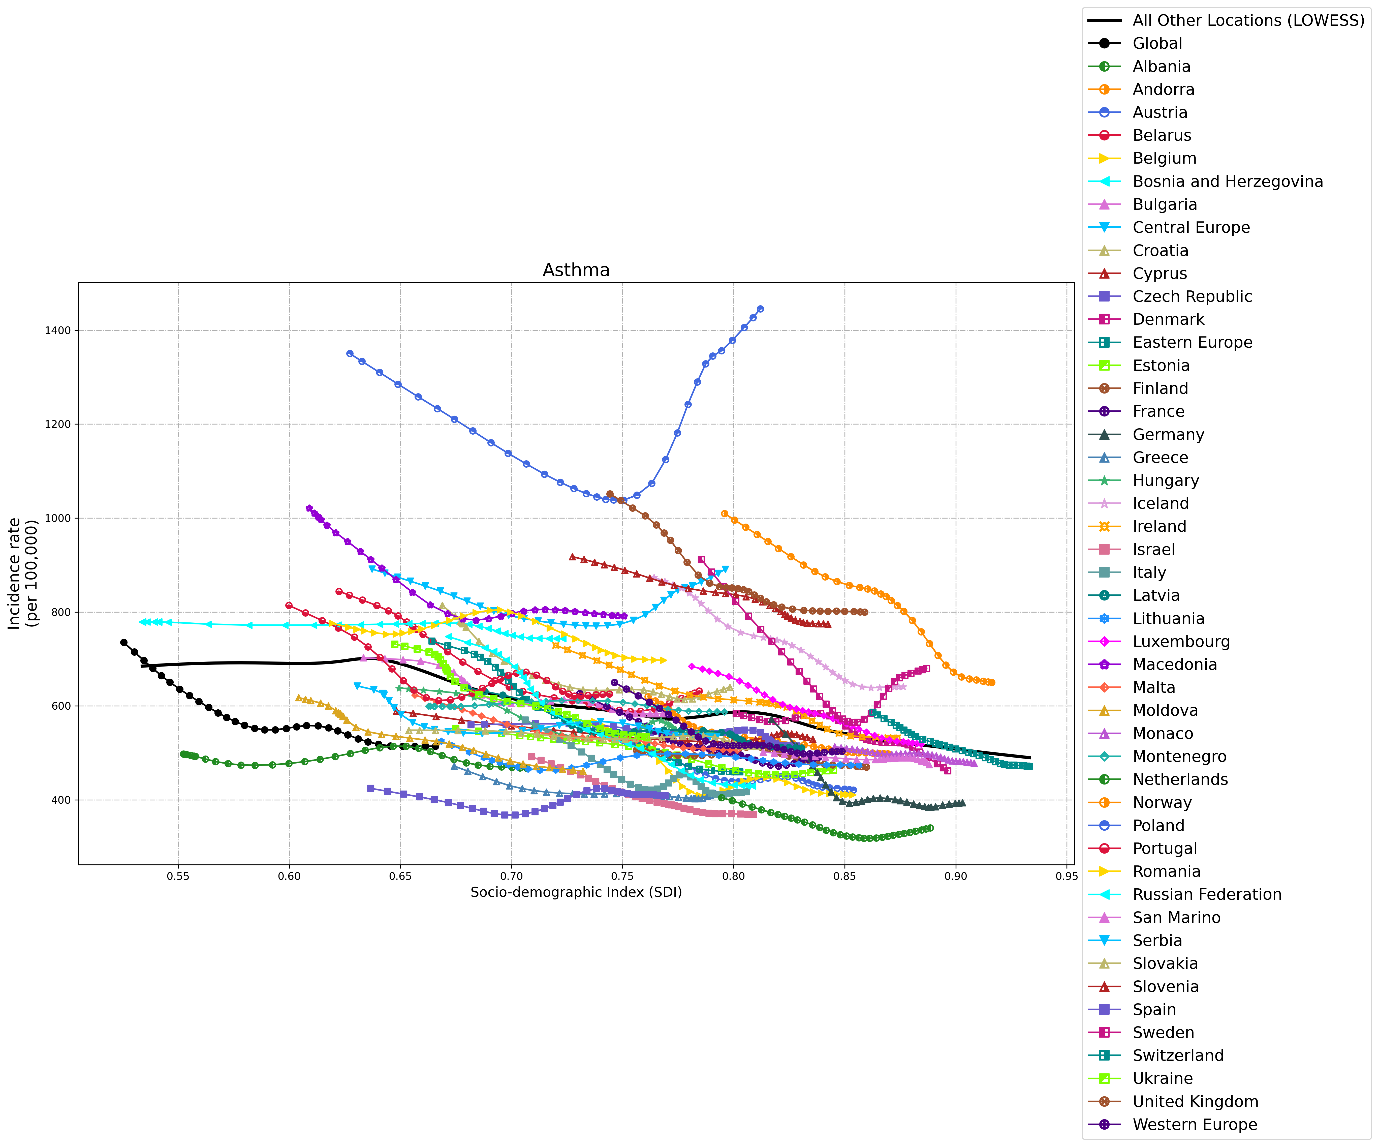

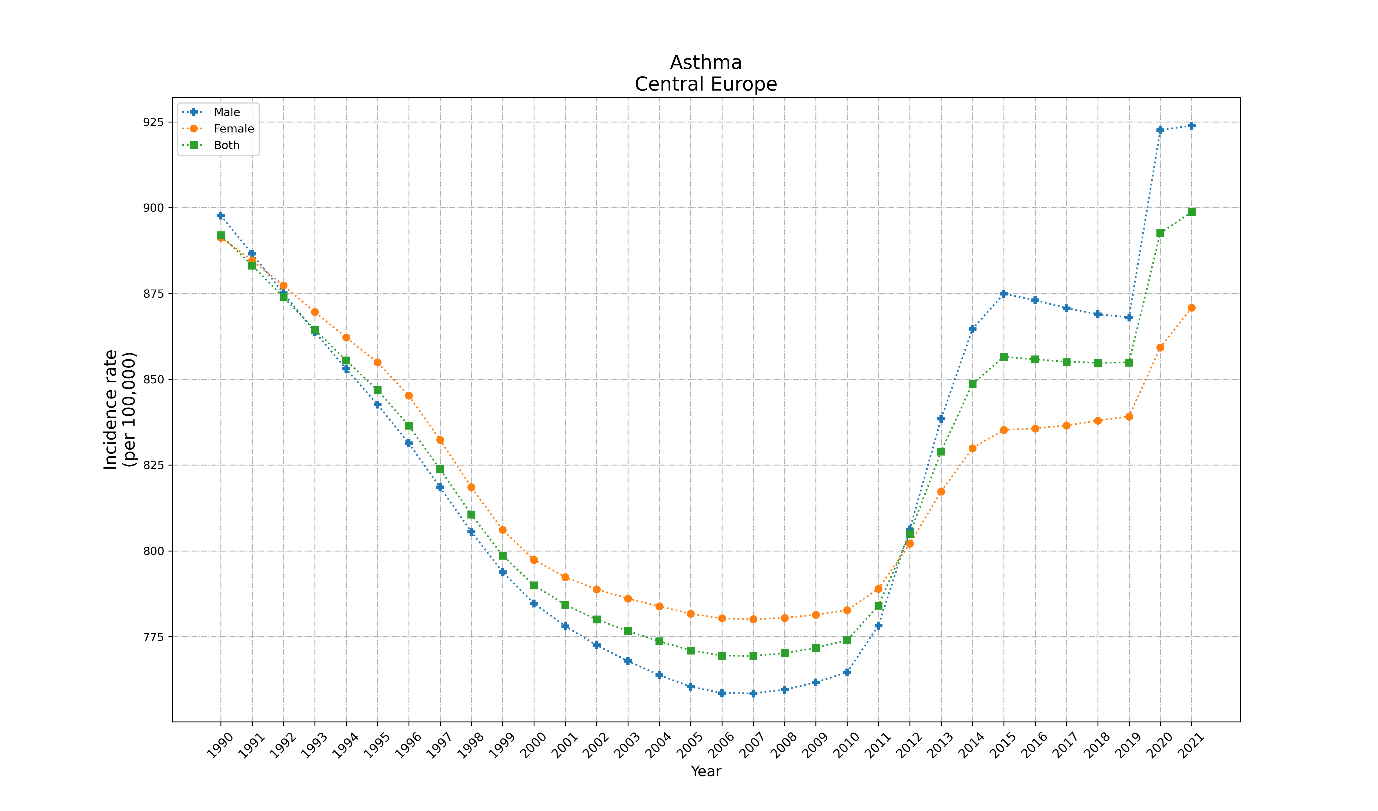

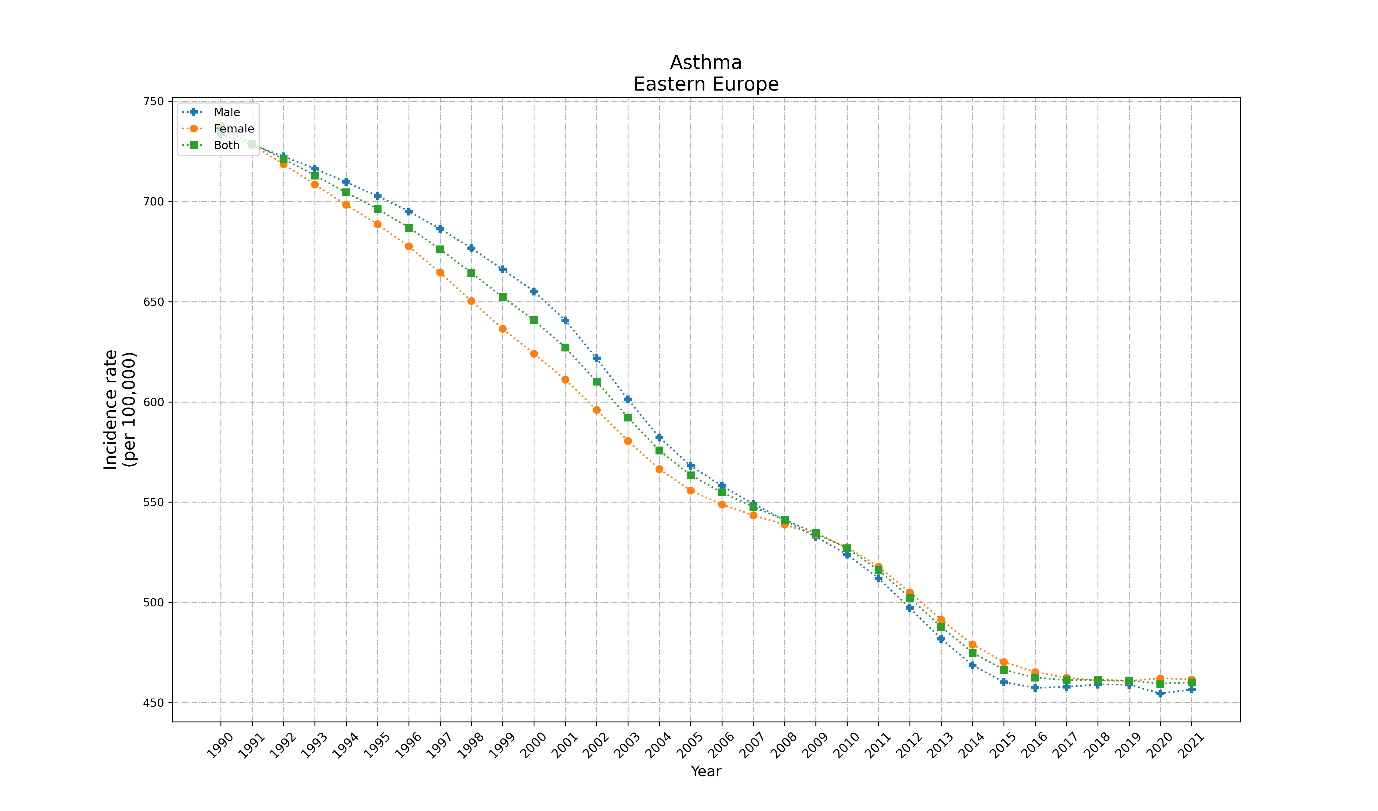

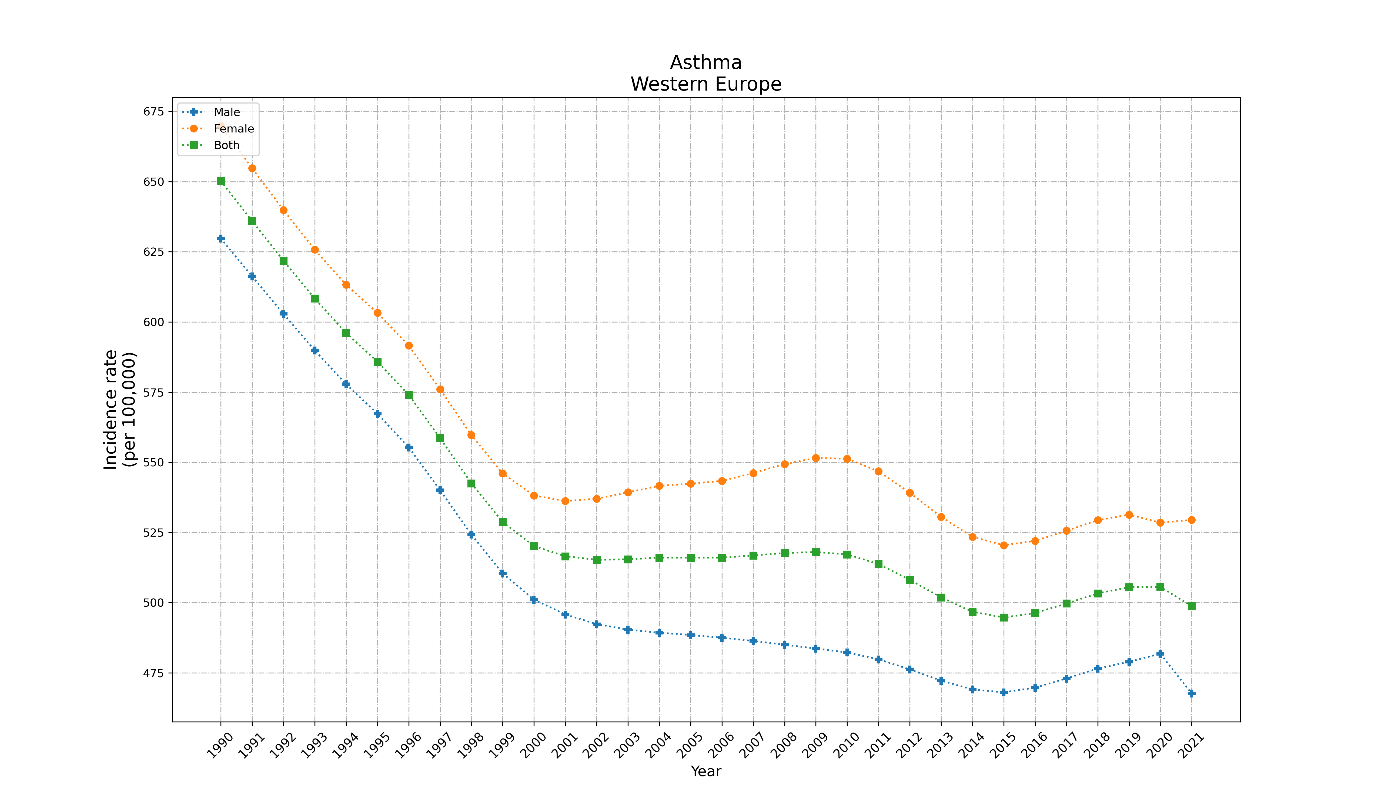

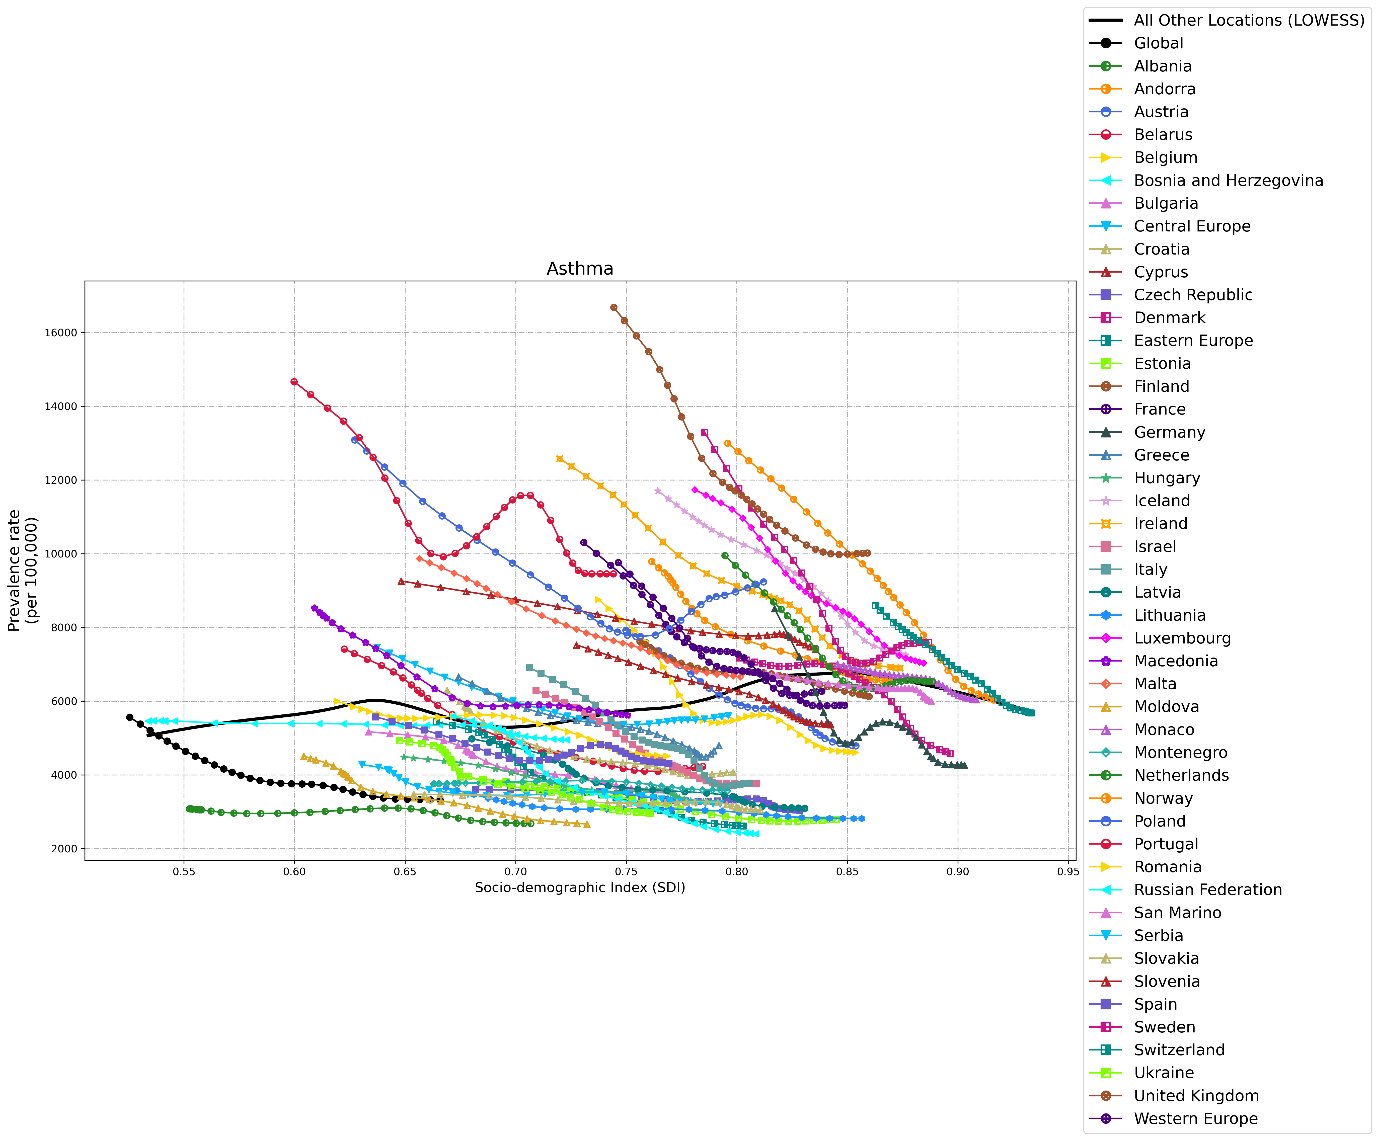

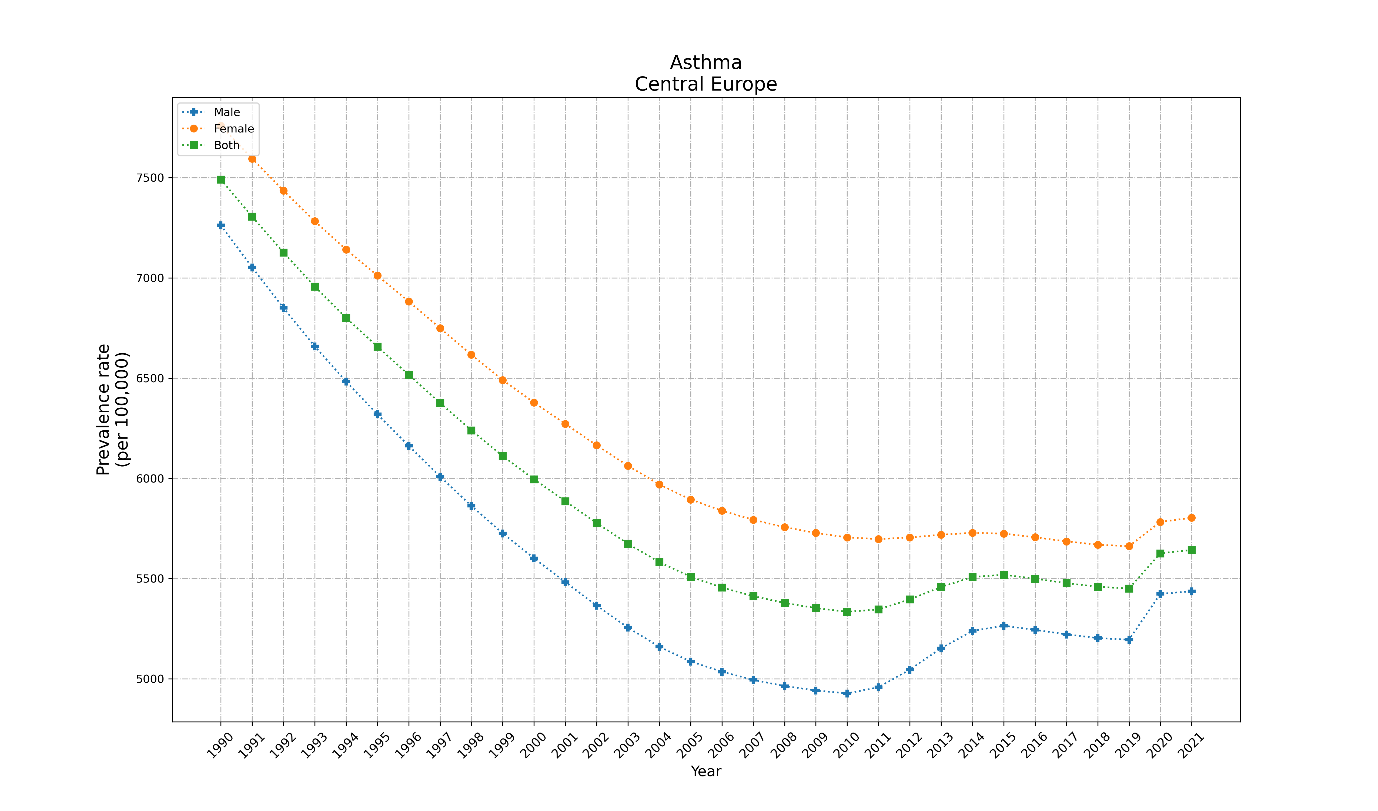

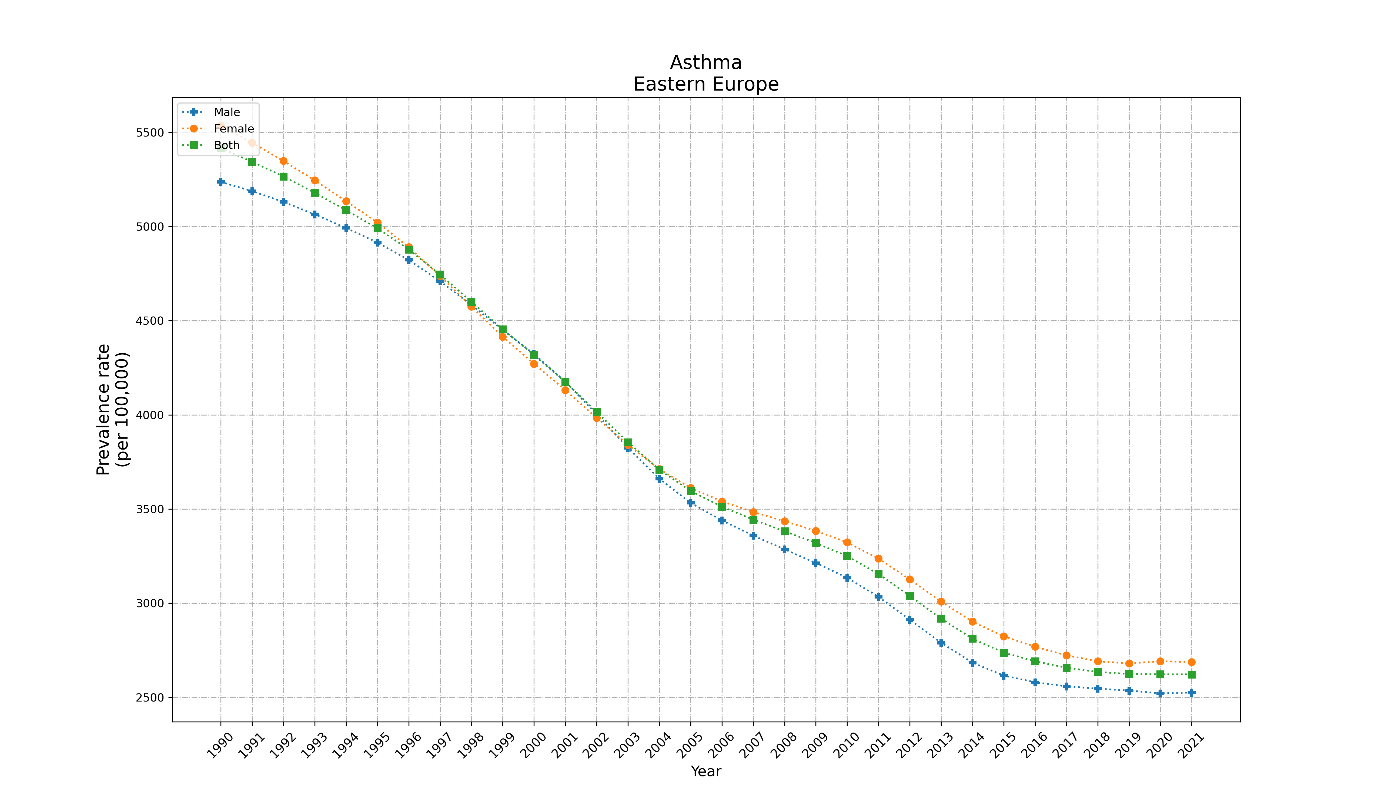

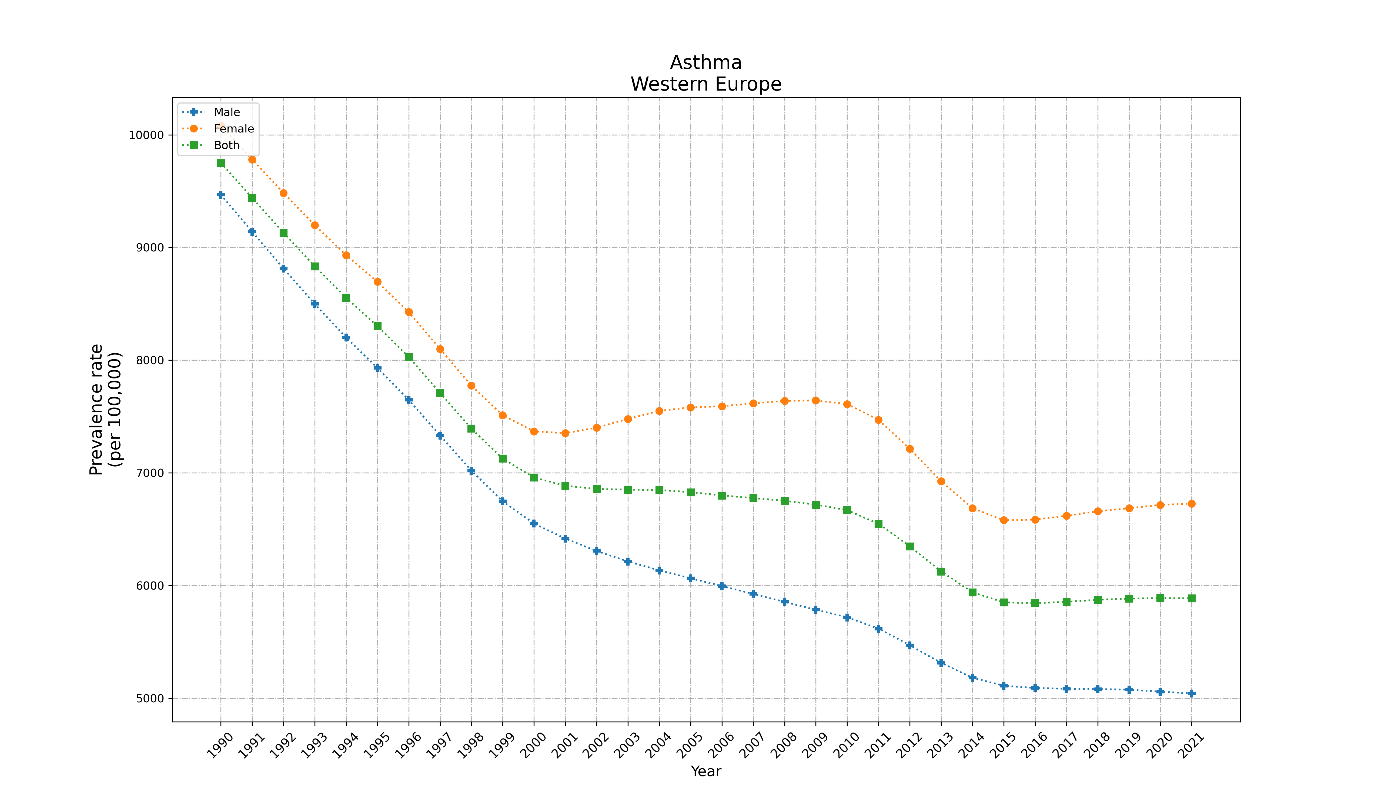

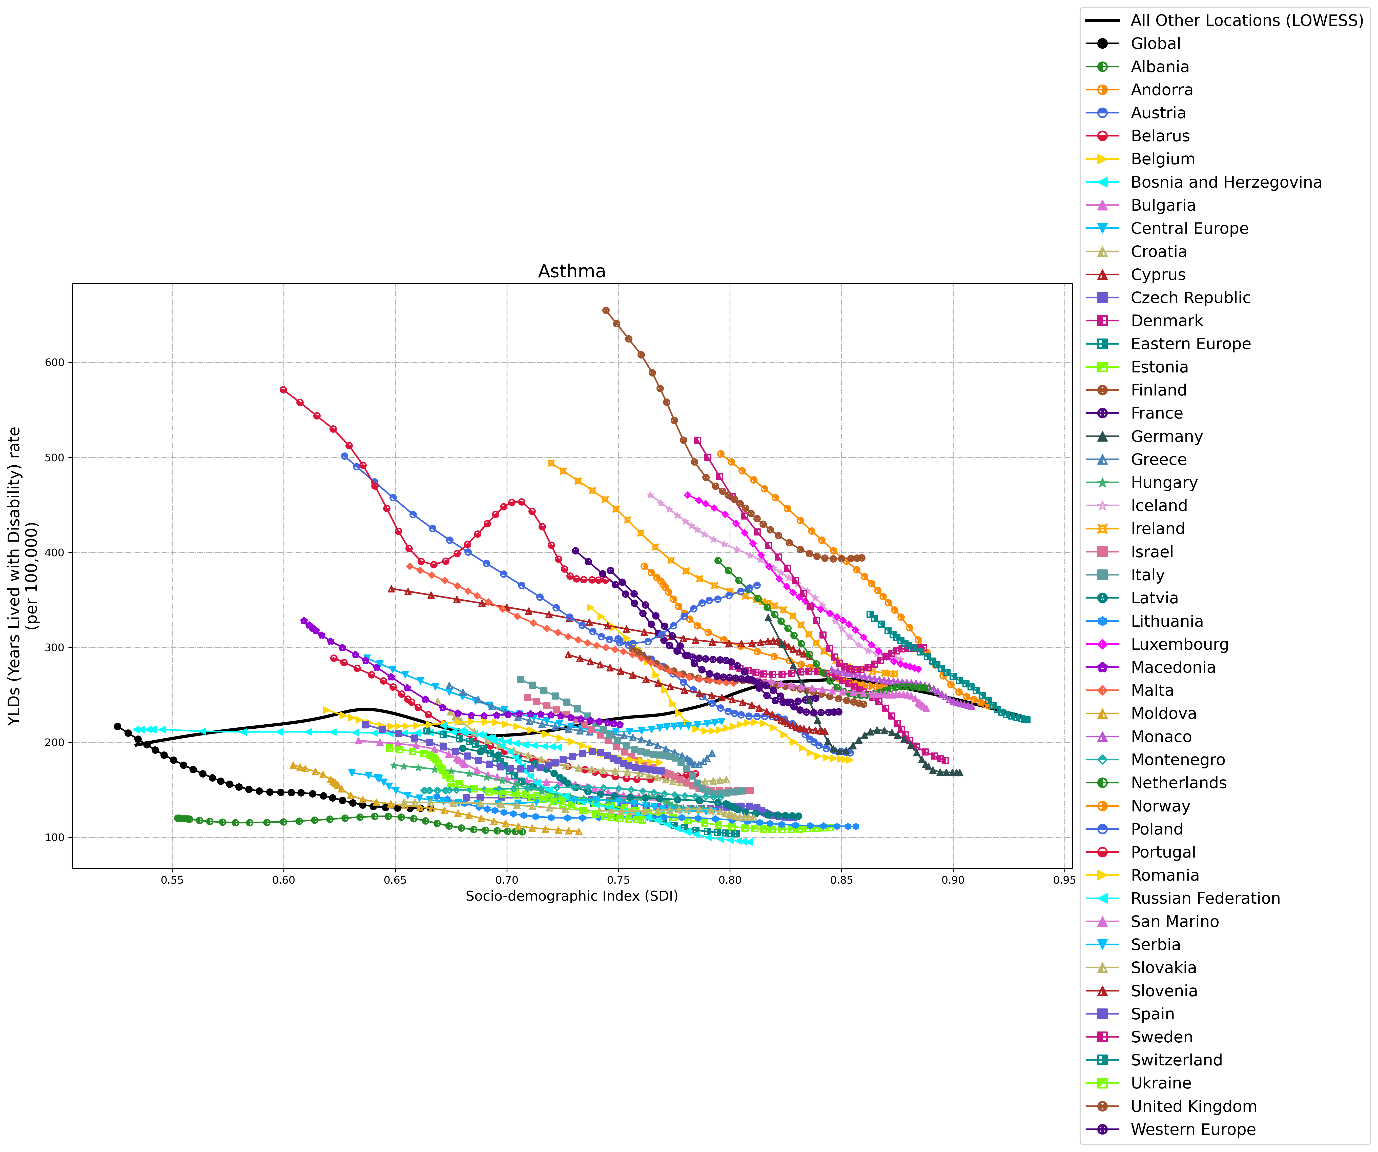

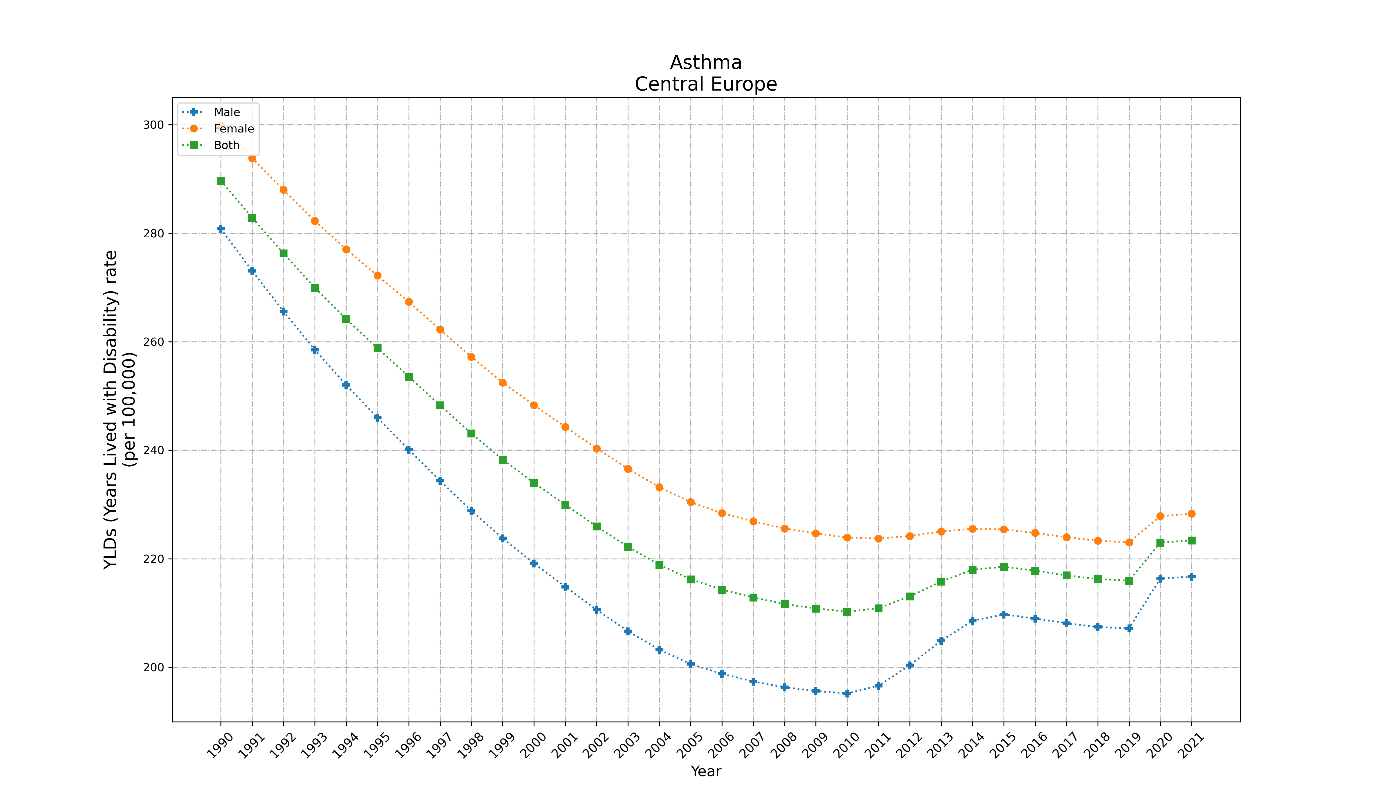

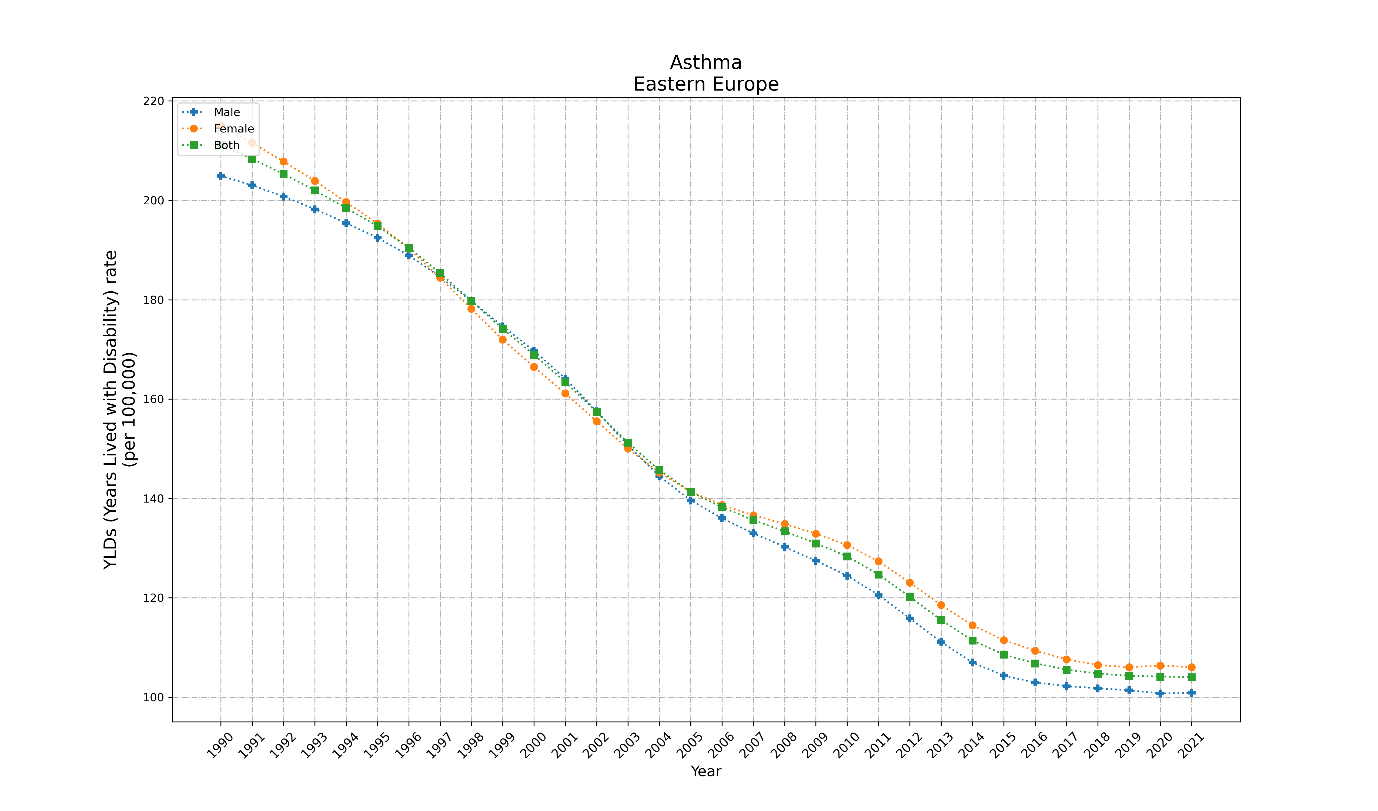

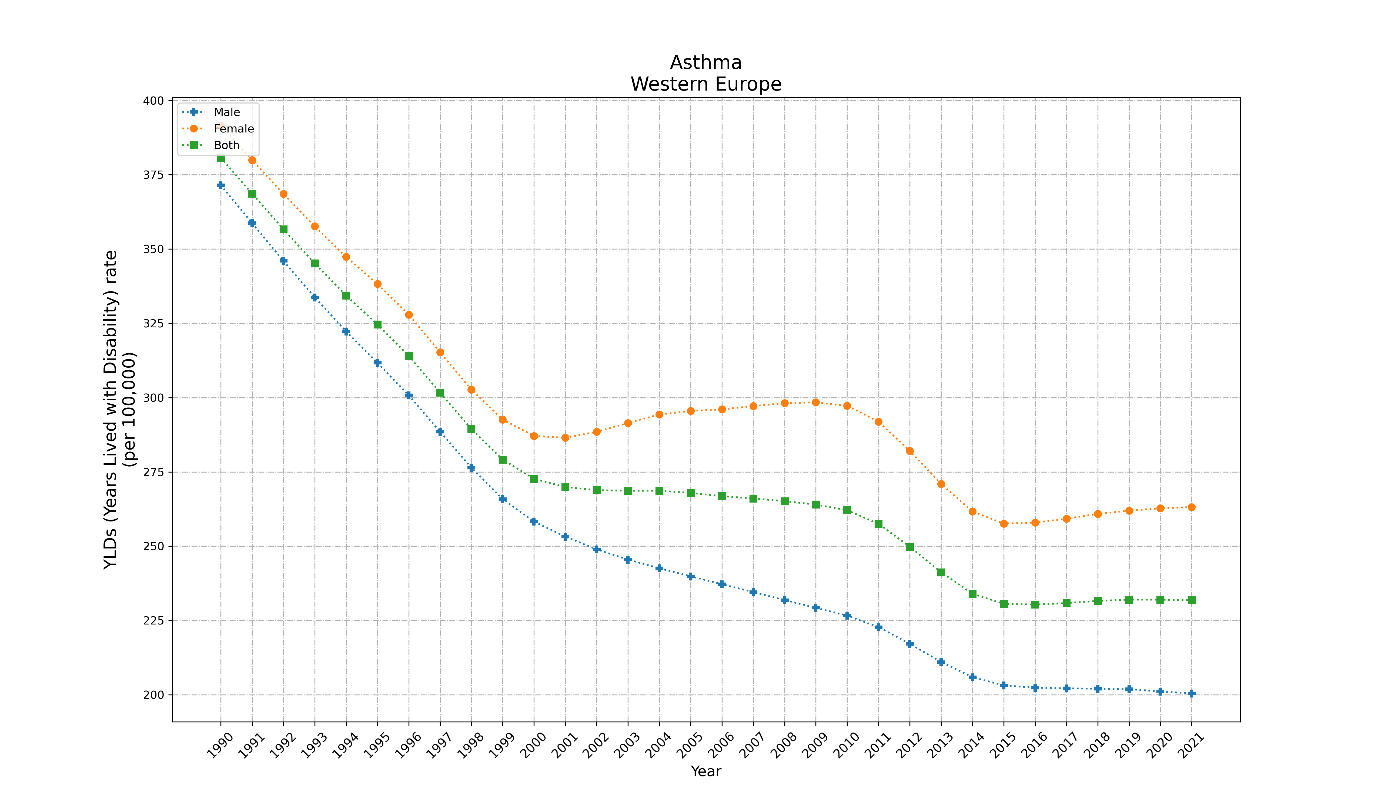


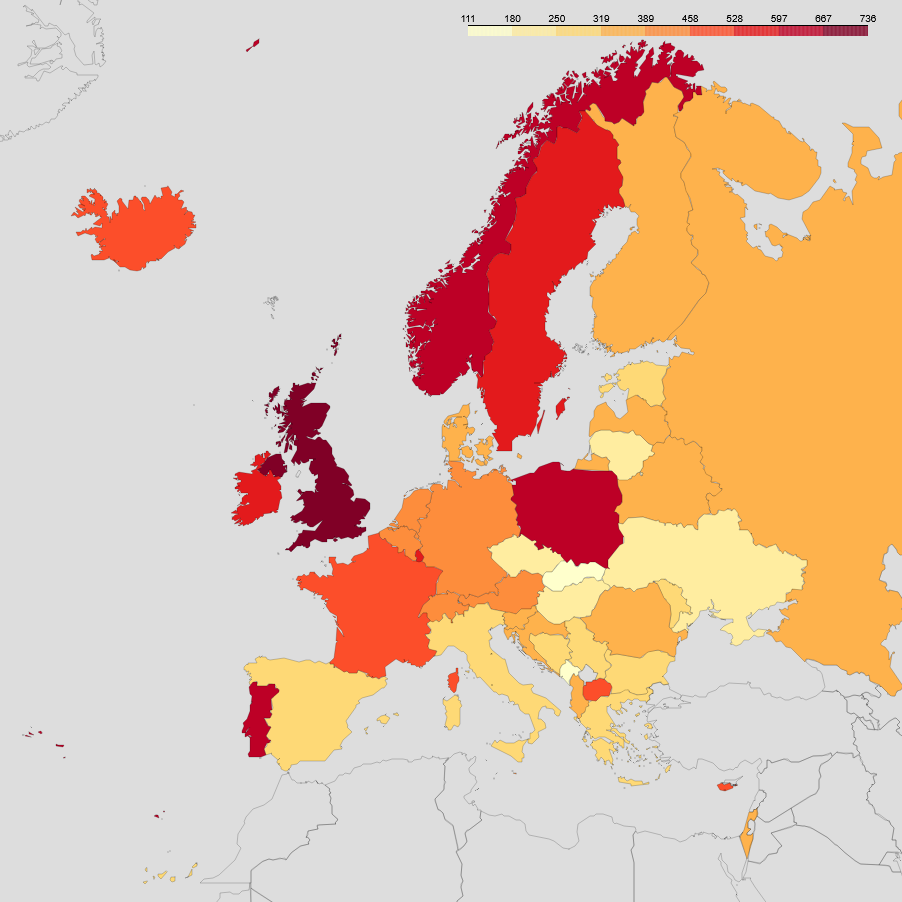


Figure 1DALY 1990


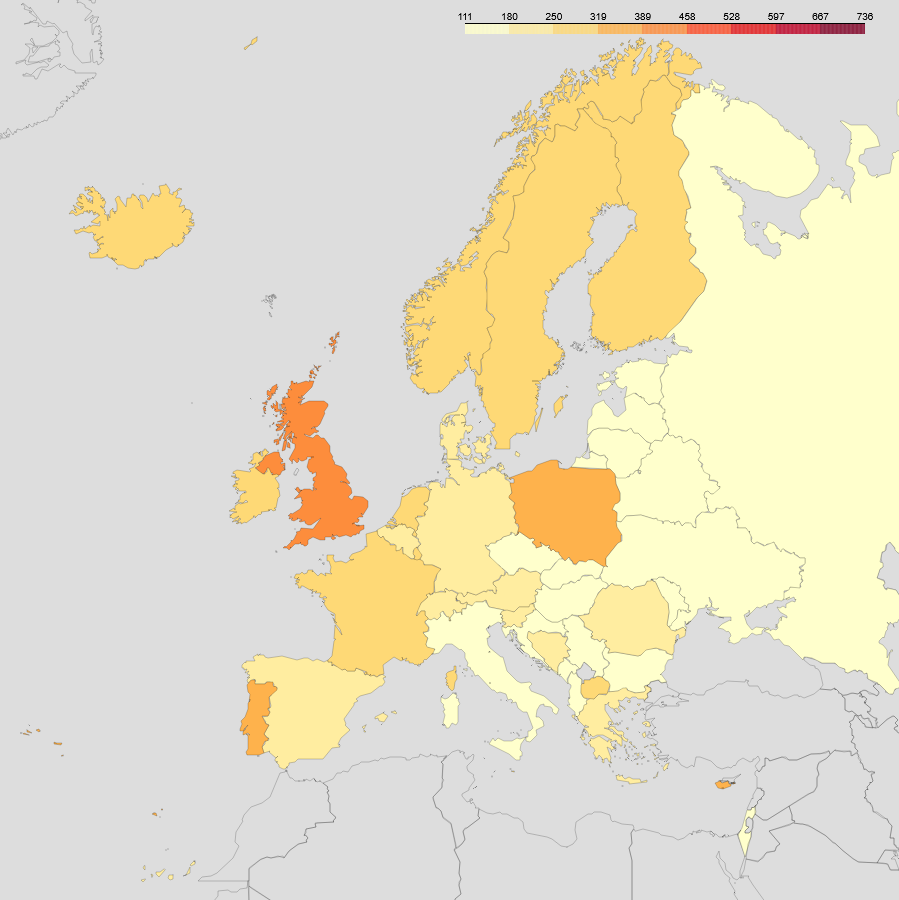


Figure 2DALY 2021


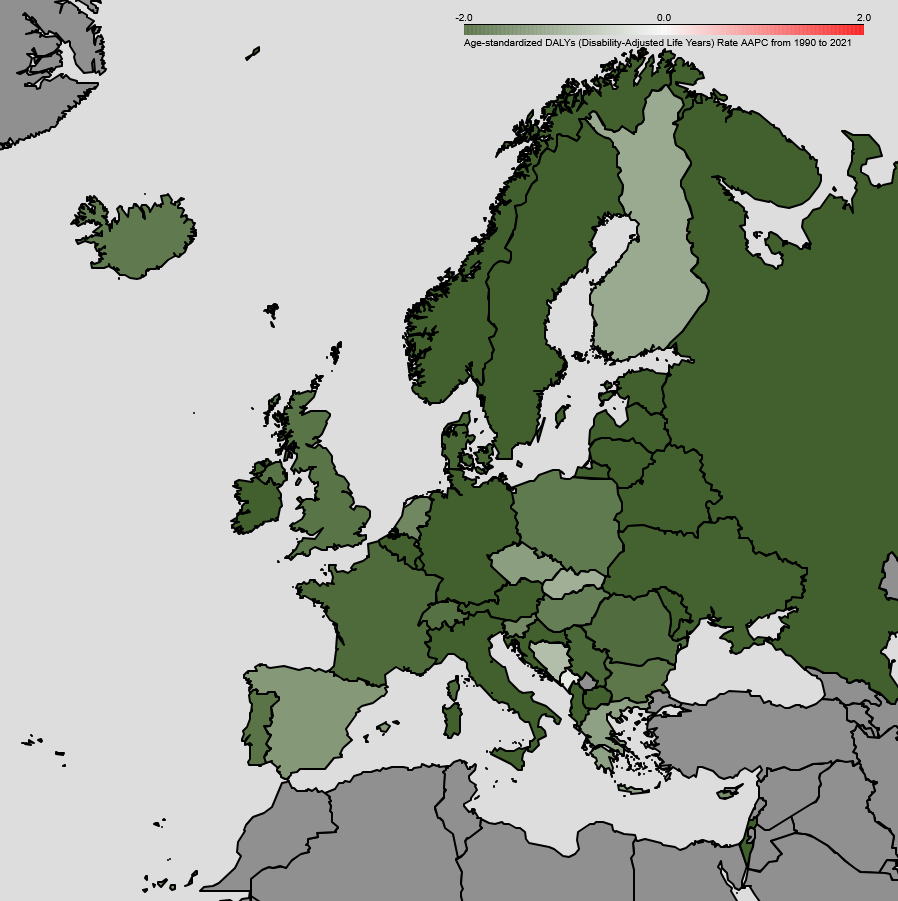


Figure DALY AAPC


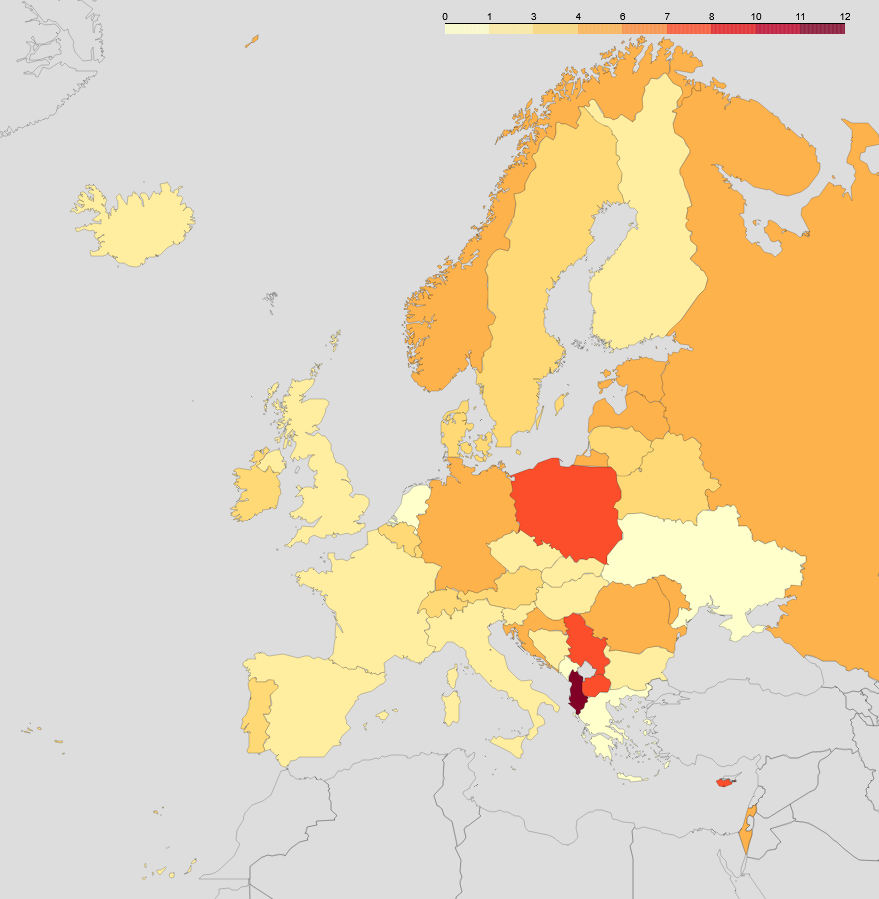


Figure 4deaths 1990


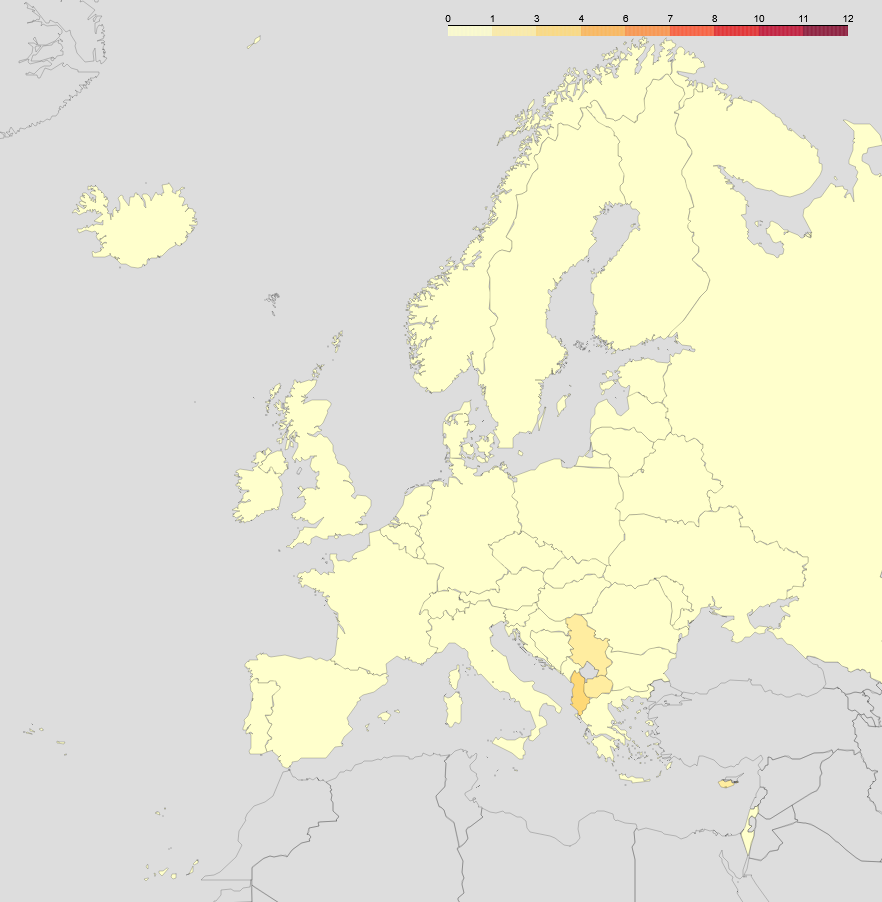


Figure 5deaths 2021


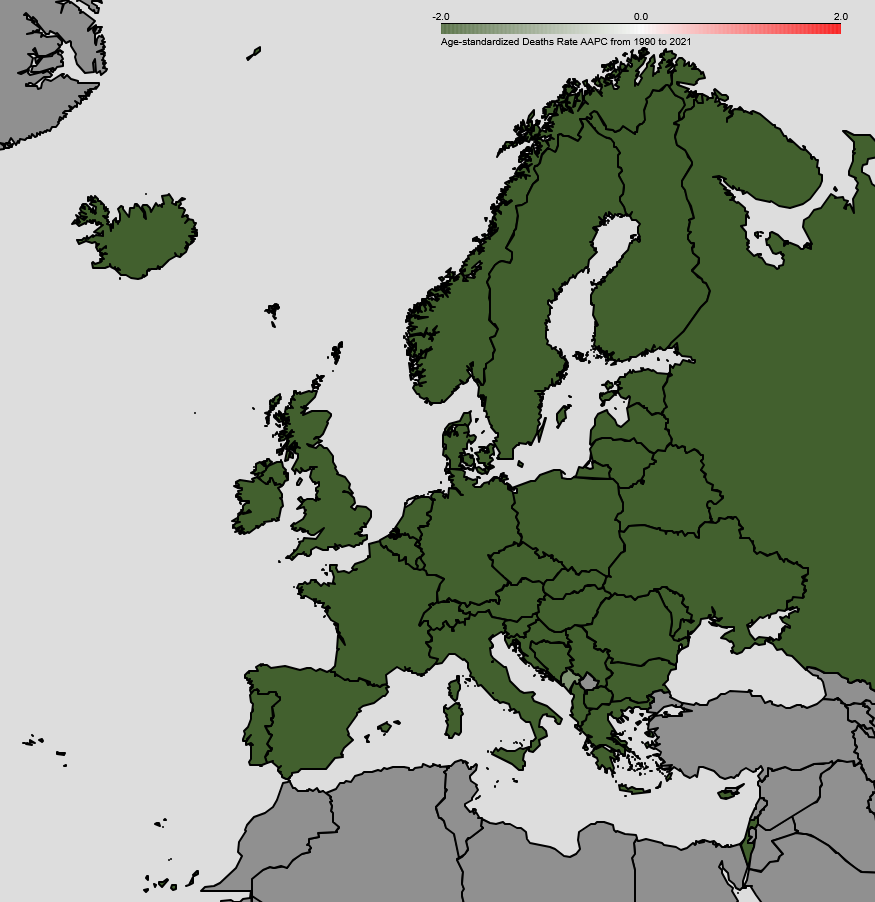


Figure 6deaths AAPC


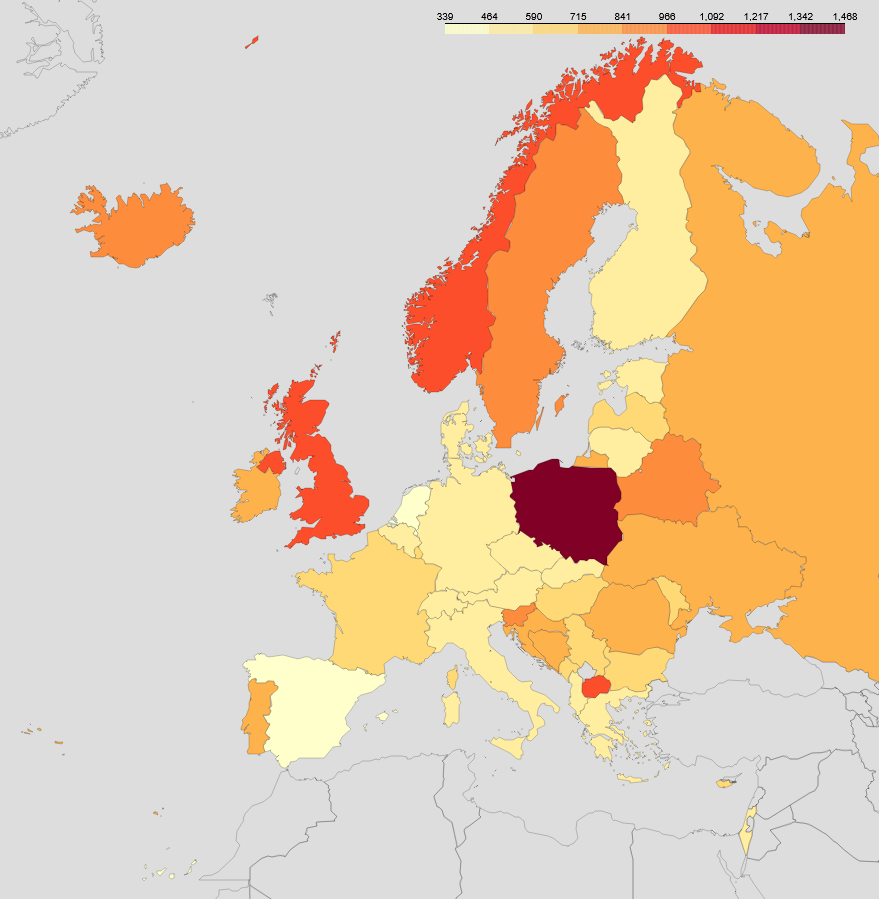


Figure 7incidence 1990


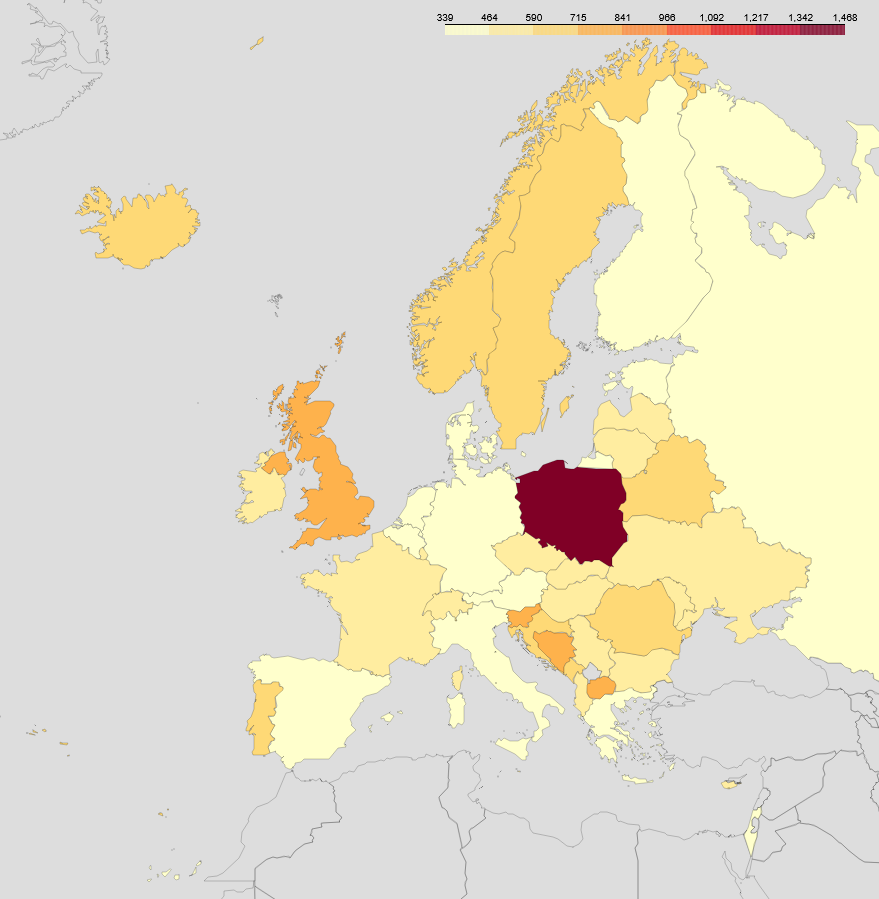


Figure 8Incidence 2021


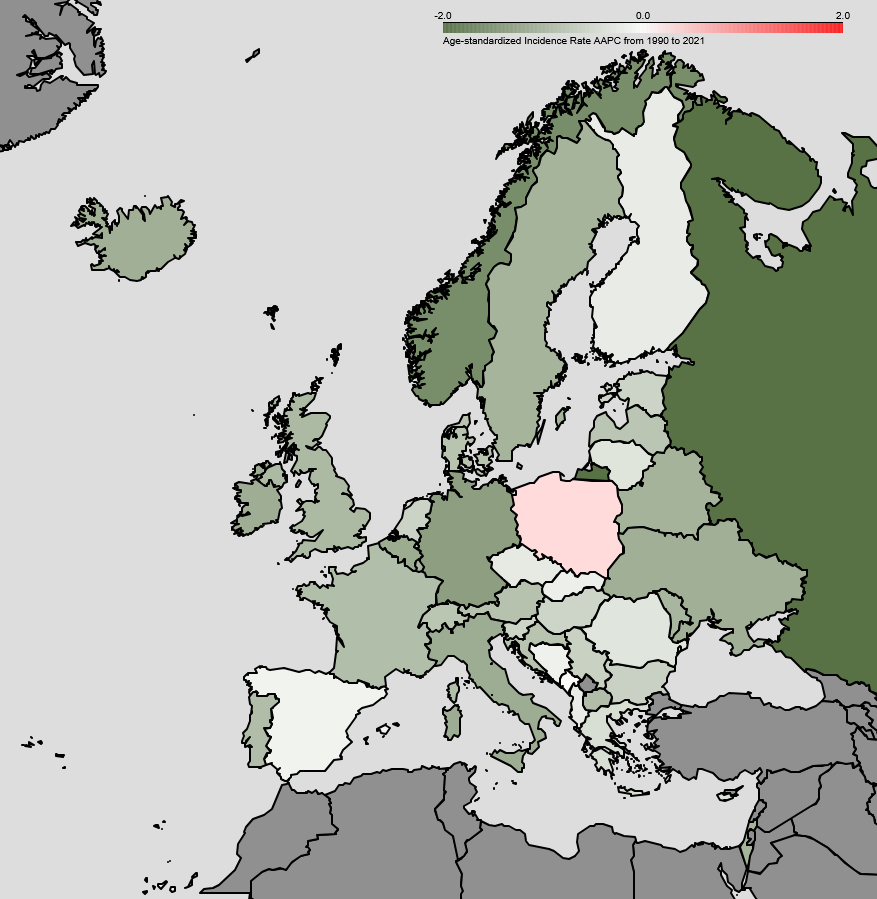


Figure 9incidence AAPC


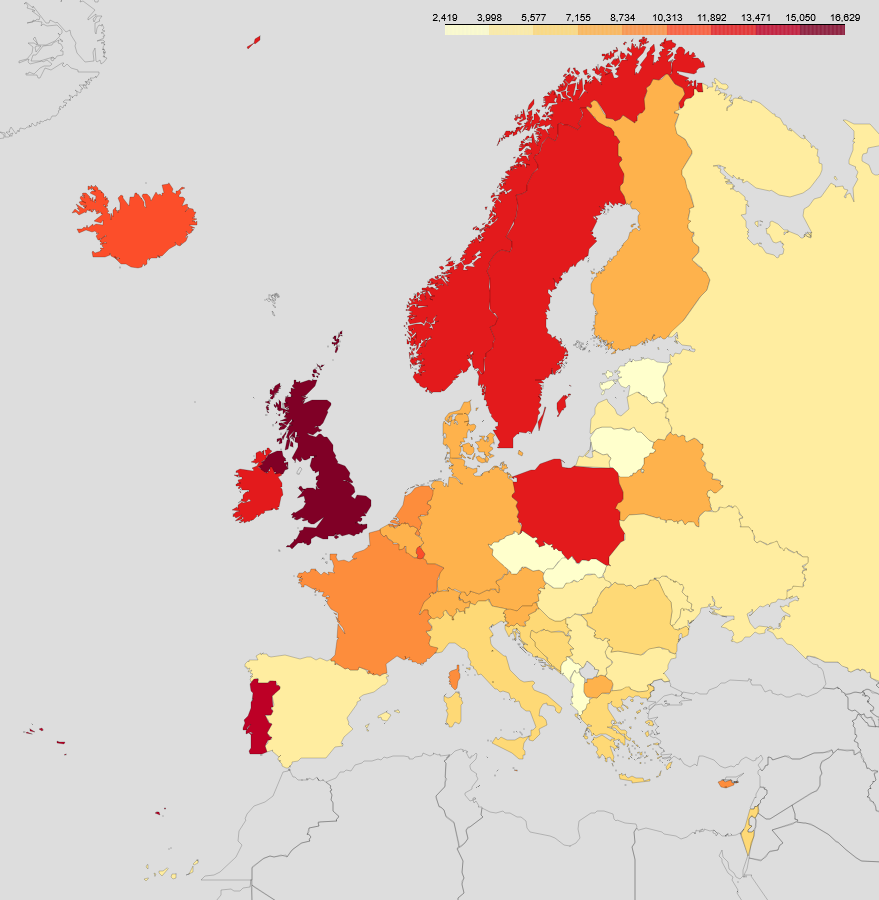


Figure 10prevalence 1990


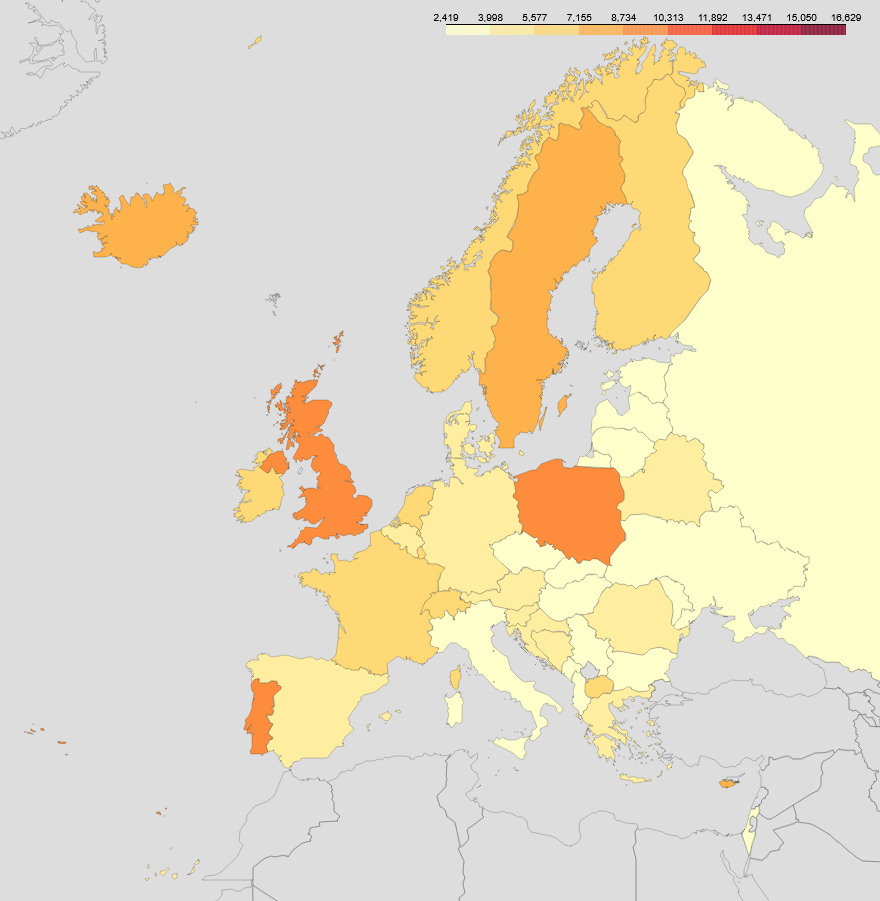


Figure 11prevalence 2021


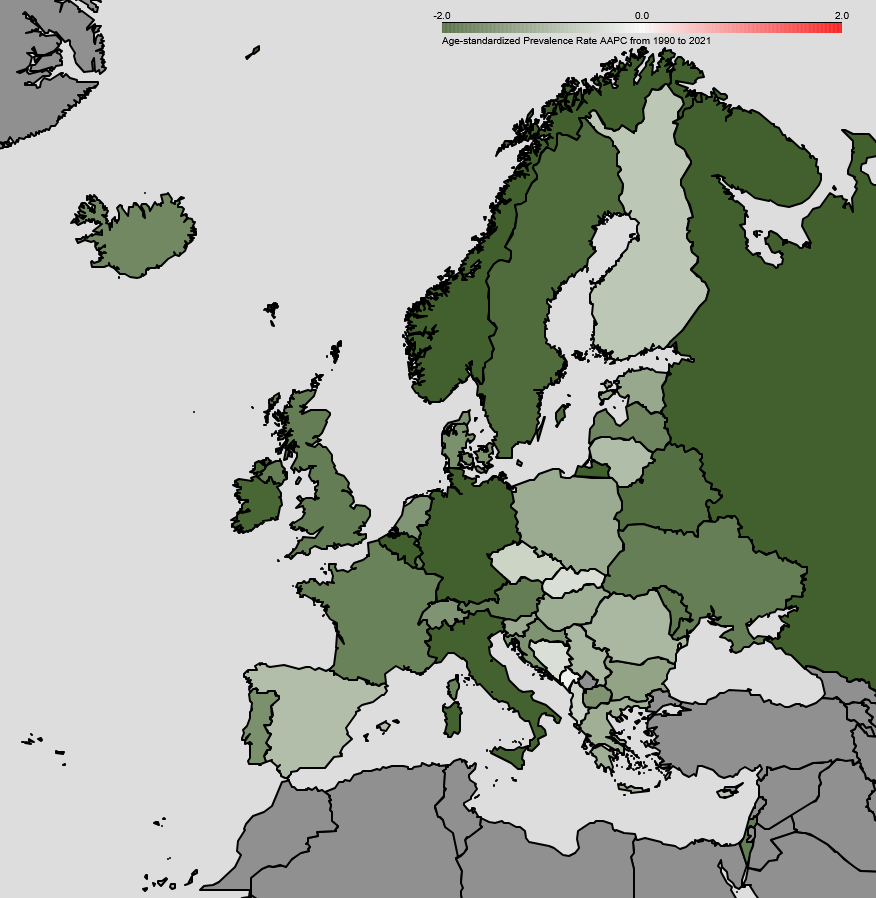


Figure prevalence AAPC


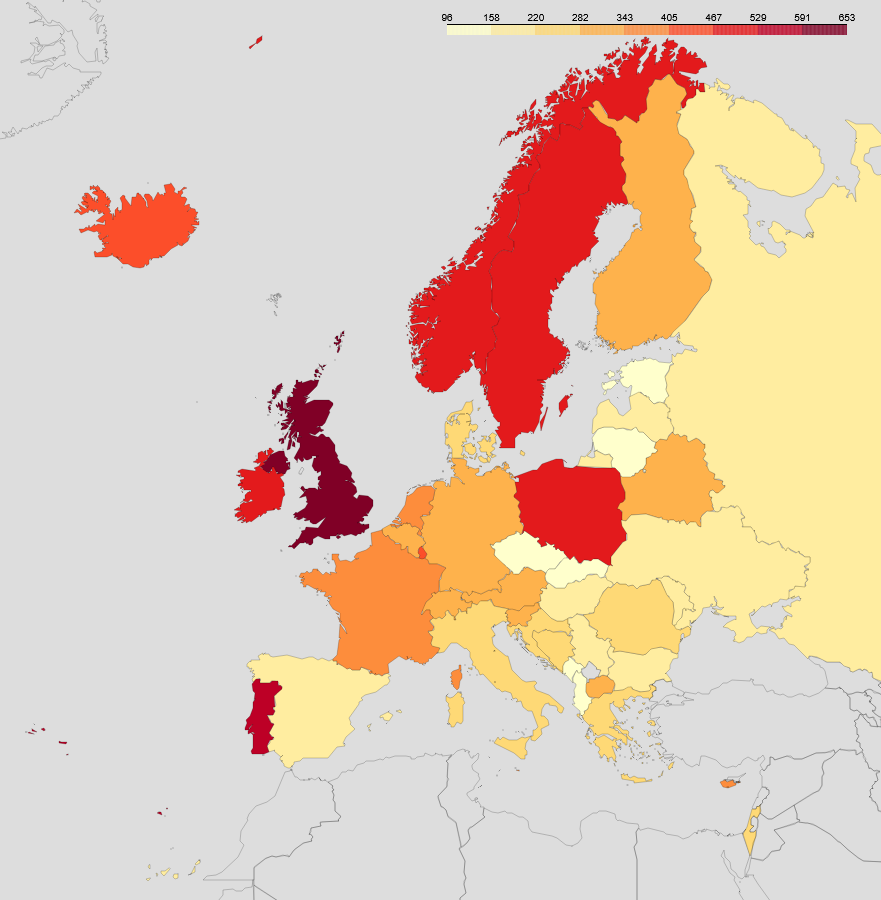


Figure 13YLD 1990


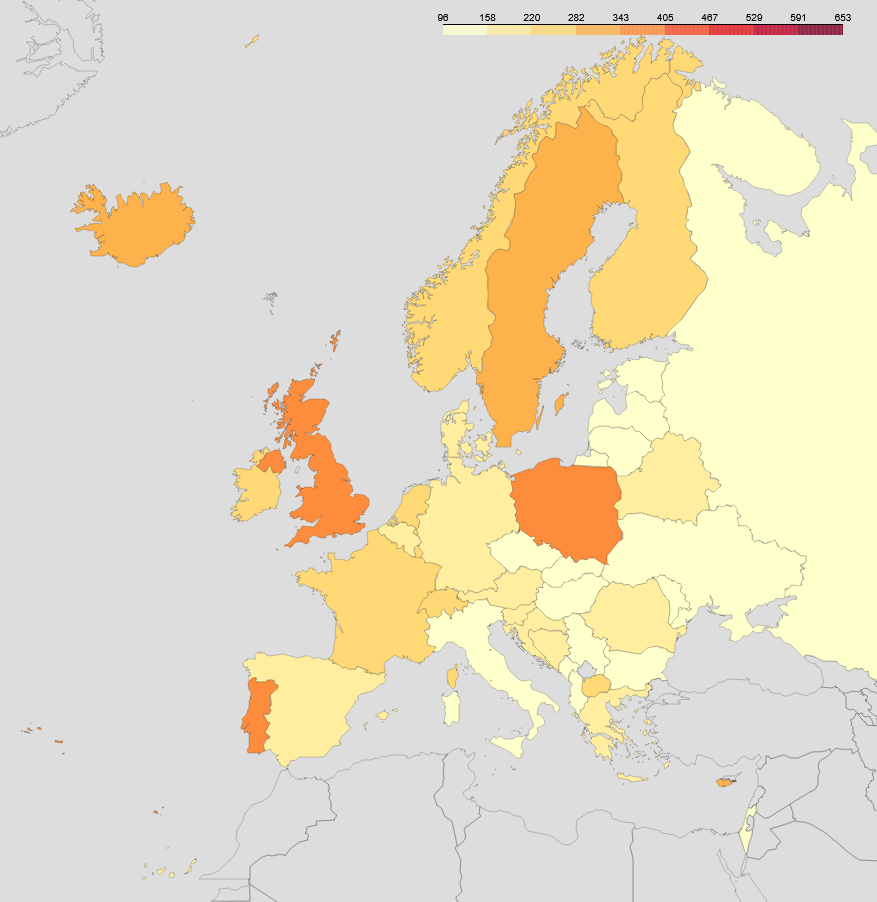


Figure 14YLD 2021


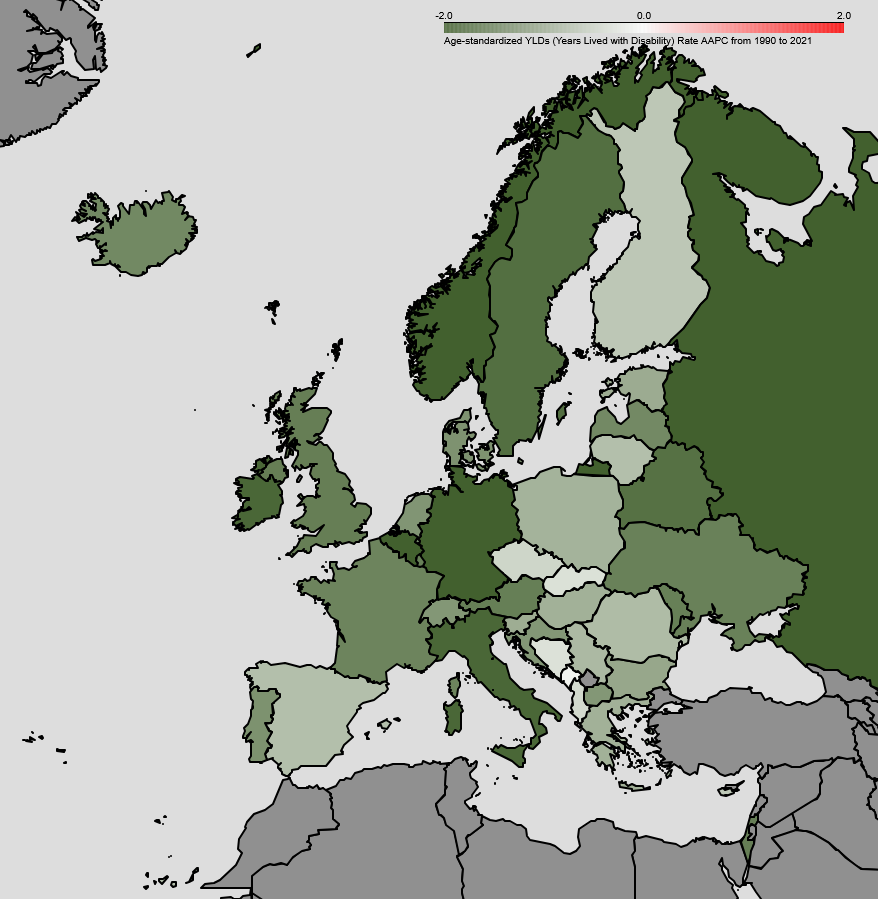


Figure YLD AAPC
